# Supplementary material for: Furan Distribution as a Severity Indicator upon Organosolv Fractionation of Hardwood Sawdust through a Novel Ternary Solvent System
Source: PubMed Central journal article supplement (PMC10828987; doi:10.1021/acssuschemeng.3c07236), 2024-01-12
Supplement: sc3c07236_si_001.pdf [file sc3c07236_si_001.pdf]

## ***Furan distribution as severity indicator upon organosolv fractionation of hardwood sawdust through novel ternary solvent system***

Petter Paulsen Thoresen,<sup>a</sup> Irene Delgado Velloso,<sup>a</sup> Heiko Lange,<sup>a,b,c</sup> Ulrika Rova,<sup>a</sup> Paul Christakopoulos<sup>a</sup> and Leonidas Matsakas<sup>a,\*</sup>

<sup>a</sup> Biochemical Process Engineering, Division of Chemical Engineering, Department of Civil, Environmental and Natural Resources Engineering, Luleå University of Technology, SE-971 87 Luleå, Sweden

<sup>b</sup> Department of Earth and Environmental Sciences, University of Milano-Bicocca, Piazza della Scienza 1, 20126 Milan, Italy

<sup>c</sup> NBFC – National Biodiversity Future Center, 90133 Palermo, Italy

\*Corresponding author: Leonidas Matsakas, Department of Civil, Environmental and Natural Resources Engineering, SE-971 87 Luleå Sweden, leonidas.matsakas@ltu.se, tel.: +46 (0) 920 493043

A. Number of pages: 14 (S1-S14)

B. Number of figures: 2

C. Number of Tables: 15

1: Page S1: Cover

2: Page S2: Lignin characterization. Tables S1.1-S1.2

3: Page S3: Lignin mass balances. Tables S2.1.1-S2.1.2

4: Page S4: Cellulose mass balances. Tables S2.2.1-S2.2.2

5: Page S5: Hemicellulose mass balance. Tables S2.3.1-S2.3.2

6: Page S6: Quaternary carbon content. Figure 1.

7: Page S7-S11: Prominent figures and tables discussed in manuscript. S4.1 (lignin motifs obtained from pyr-GC/MS), S4.2 (lignin motifs obtained from pyr-GC/MS), S4.3 (dehydration products in liquor), and S4.4 (dehydration products in liquor). Figure S2 (lignin monomeric ratios from HSQC and Pyr-GC/MS).

8: Page S12: Table S5.1 (assigned NMR shifts).

9: Page S13 – page S28: Figures S2 – S18, detailing <sup>13</sup>C NMR and HSQC spectra.

## S1 Lignin characterization

Table S1.1: Compositional data for the lignins isolated without additional of mineral acid.

| <b>Treatment</b> | <b>Klason lignin content [%g/g] Primary (wash)</b> | <b>Hemicellulosic sugar content [%g/g] Primary (wash)</b> | <b>Cellulosic sugar content [%g/g] Primary (wash)</b> |
|------------------|----------------------------------------------------|-----------------------------------------------------------|-------------------------------------------------------|
| <b>A0-1</b>      | 0.85 (0.91)                                        | 2.01 (1.17)                                               | 0.29 (0.01)                                           |
| <b>A0-2</b>      | 0.87 (0.89)                                        | 2.15 (1.17)                                               | 0.00 (0.01)                                           |
| <b>A0-3</b>      | 0.90 (0.76)                                        | 2.03 (1.45)                                               | 0.24 (0.34)                                           |
| <b>A0-4</b>      | 0.86 (0.89)                                        | 2.33 (1.03)                                               | 0.45 (0.11)                                           |
| <b>A0-5</b>      | 0.89 (0.89)                                        | 1.68 (1.08)                                               | 0.44 (0.20)                                           |
| <b>A0-6</b>      | 0.89 (0.90)                                        | 1.81 (0.00)                                               | 0.26 (0.00)                                           |
| <b>A0-7</b>      | 0.87 (0.89)                                        | 2.68 (1.64)                                               | 0.43 (0.68)                                           |
| <b>A0-8</b>      | 0.83 (0.89)                                        | 3.47 (1.53)                                               | 0.46 (0.54)                                           |
| <b>A0-9</b>      | 0.88 (0.90)                                        | 2.32 (1.66)                                               | 0.37 (0.87)                                           |
| <b>A0-10</b>     | 0.87 (0.88)                                        | 1.96 (1.30)                                               | 0.58 (1.08)                                           |
| <b>A0-11</b>     | 0.90 (0.91)                                        | 1.42 (1.06)                                               | 0.36 (0.62)                                           |
| <b>A0-12</b>     | 0.88 (0.90)                                        | 1.54 (1.18)                                               | 0.34 (0.48)                                           |

Table S1.2: Compositional data for the lignins isolated with additional of mineral acid.

| <b>Treatment</b> | <b>Klason lignin content [%g/g] Primary (wash)</b> | <b>Hemicellulosic sugar content [%g/g] Primary (wash)</b> | <b>Cellulosic sugar content [%g/g] Primary (wash)</b> |
|------------------|----------------------------------------------------|-----------------------------------------------------------|-------------------------------------------------------|
| <b>A20-1</b>     | 0.92 (0.89)                                        | 0.40 (0.38)                                               | 0.84 (0.71)                                           |
| <b>A20-2</b>     | 0.92 (0.93)                                        | 0.24 (0.23)                                               | 0.53 (0.51)                                           |
| <b>A20-3</b>     | 0.92 (0.91)                                        | 0.13 (0.22)                                               | 0.61 (0.63)                                           |
| <b>A20-4</b>     | 0.92 (0.90)                                        | 0.19 (1.01)                                               | 0.57 (3.60)                                           |
| <b>A20-5</b>     | 0.92 (0.91)                                        | 0.28 (0.77)                                               | 0.81 (1.65)                                           |
| <b>A20-6</b>     | 0.91 (0.91)                                        | 0.22 (0.19)                                               | 0.59 (0.52)                                           |
| <b>A20-7</b>     | 0.89 (0.86)                                        | 0.44 (1.37)                                               | 0.98 (2.64)                                           |
| <b>A20-8</b>     | 0.91 (0.89)                                        | 0.24 (0.22)                                               | 0.57 (0.71)                                           |
| <b>A20-9</b>     | 0.91 (0.90)                                        | 0.51 (0.12)                                               | 1.24 (2.84)                                           |
| <b>A20-10</b>    | 0.82 (0.89)                                        | 0.50 (0.94)                                               | 1.58 (2.05)                                           |
| <b>A20-11</b>    | 0.92 (0.86)                                        | 0.21 (0.50)                                               | 0.51 (7.94)                                           |
| <b>A20-12</b>    | 0.92 (0.91)                                        | 0.27 (0.70)                                               | 0.90 (2.41)                                           |

## S2 Mass balances

### S2.1 Lignin mass balance

Table S2.1.1: Mass balance data for the lignins (Klason lignin content) isolated without addition of mineral acid.

| Treatment | Lignin recovered in pulp [%g/g in raw] | Primary lignin recovered [%g/g in raw] | Wash lignin recovered [%g/g in raw] | Lignin recovered in primary liquid [%g/g in raw] | Lignin recovered in wash liquid [%g/g in raw] | Sum [%] |
|-----------|----------------------------------------|----------------------------------------|-------------------------------------|--------------------------------------------------|-----------------------------------------------|---------|
| A0-1      | 59.26                                  | 37.08                                  | 4.50                                | 6.64                                             | 2.01                                          | 109.49  |
| A0-2      | 53.29                                  | 35.21                                  | 6.22                                | 7.29                                             | 2.09                                          | 104.10  |
| A0-3      | 50.30                                  | 44.09                                  | 5.52                                | 7.91                                             | 11.61                                         | 119.43  |
| A0-4      | 39.29                                  | 51.01                                  | 6.81                                | 7.70                                             | 1.91                                          | 106.72  |
| A0-5      | 35.37                                  | 51.29                                  | 7.34                                | 6.56                                             | 2.09                                          | 102.65  |
| A0-6      | 42.40                                  | 55.80                                  | 7.16                                | 6.02                                             | 1.72                                          | 113.11  |
| A0-7      | 44.80                                  | 44.40                                  | 6.46                                | 3.71                                             | 0.79                                          | 100.16  |
| A0-8      | 42.59                                  | 55.72                                  | 6.27                                | 6.57                                             | 5.83                                          | 116.99  |
| A0-9      | 42.03                                  | 49.28                                  | 4.96                                | 5.02                                             | 0.59                                          | 101.87  |
| A0-10     | 57.29                                  | 31.91                                  | 6.01                                | 3.55                                             | 2.19                                          | 100.95  |
| A0-11     | 60.40                                  | 39.71                                  | 3.08                                | 4.45                                             | 0.74                                          | 108.39  |
| A0-12     | 58.41                                  | 43.04                                  | 3.13                                | 7.88                                             | 0.55                                          | 113.02  |

Table S2.1.2: Mass balance data for the lignins (Klason lignin content) isolated with addition of mineral acid.

| Treatment | Lignin recovered in pulp [%g/g in raw] | Primary lignin recovered [%g/g in raw] | Wash lignin recovered [%g/g in raw] | Lignin recovered in primary liquid [%g/g in raw] | Lignin recovered in wash liquid [%g/g in raw] | Sum [%] |
|-----------|----------------------------------------|----------------------------------------|-------------------------------------|--------------------------------------------------|-----------------------------------------------|---------|
| A20-1     | 38.38                                  | 44.07                                  | 6.64                                | 6.34                                             | 0.64                                          | 96.07   |
| A20-2     | 36.18                                  | 47.14                                  | 6.79                                | 7.39                                             | 0.88                                          | 98.38   |
| A20-3     | 37.38                                  | 52.97                                  | 7.64                                | 7.92                                             | 0.35                                          | 106.26  |
| A20-4     | 19.38                                  | 68.77                                  | 9.06                                | 7.52                                             | 0.41                                          | 105.14  |
| A20-5     | 15.10                                  | 67.38                                  | 9.30                                | 7.62                                             | 0.37                                          | 99.76   |
| A20-6     | 12.68                                  | 76.28                                  | 11.21                               | 9.98                                             | 0.25                                          | 110.40  |
| A20-7     | 7.44                                   | 76.43                                  | 10.07                               | 7.18                                             | 0.42                                          | 101.54  |
| A20-8     | 5.77                                   | 89.35                                  | 9.33                                | 9.01                                             | 0.56                                          | 114.01  |
| A20-9     | 5.88                                   | 98.56                                  | 11.04                               | 12.05                                            | 0.58                                          | 128.11  |
| A20-10    | 6.86                                   | 70.02                                  | 5.13                                | 9.73                                             | 0.58                                          | 92.32   |
| A20-11    | 5.53                                   | 81.59                                  | 9.60                                | 10.60                                            | 0.35                                          | 107.66  |
| A20-12    | 5.23                                   | 100.71                                 | 5.56                                | 14.91                                            | 0.50                                          | 126.90  |

## S2.2 Cellulose mass balance

Table S2.2.1: Mass balance data for the cellulose isolated without addition of mineral acid.

| Treatment | Cellulose recovered in pulp [%g/g in raw] | Cellulose recovered in primary lignin [%g/g in raw] | Cellulose recovered in wash lignin [%g/g in raw] | Cellulose recovered in prim. Liq. as mono. [%g/g in raw] | Cellulose recovered in prim liq. as polym. [%g/g in raw] | Cellulose recovered in wash Liq. as mono. [%g/g in raw] | Cellulose recovered in wash liq. as polym. [%g/g in raw] | Sum [%g/g in raw] |
|-----------|-------------------------------------------|-----------------------------------------------------|--------------------------------------------------|----------------------------------------------------------|----------------------------------------------------------|---------------------------------------------------------|----------------------------------------------------------|-------------------|
| A0-1      | 95.22                                     | 0.08                                                | 0.00                                             | 1.99                                                     | 0.00                                                     | 0.03                                                    | 0.17                                                     | 97.50             |
| A0-2      | 83.90                                     | 0.00                                                | 0.00                                             | 0.56                                                     | 0.58                                                     | 0.00                                                    | 0.22                                                     | 85.26             |
| A0-3      | 101.15                                    | 0.07                                                | 0.01                                             | 0.38                                                     | 0.97                                                     | 0.07                                                    | 0.20                                                     | 102.86            |
| A0-4      | 92.89                                     | 0.16                                                | 0.01                                             | 0.47                                                     | 0.44                                                     | 0.00                                                    | 0.22                                                     | 94.19             |
| A0-5      | 92.21                                     | 0.16                                                | 0.01                                             | 0.42                                                     | 0.66                                                     | 0.00                                                    | 0.29                                                     | 93.74             |
| A0-6      | 98.52                                     | 0.10                                                | 0.00                                             | 0.33                                                     | 0.78                                                     | 0.00                                                    | 0.21                                                     | 99.94             |
| A0-7      | 102.07                                    | 0.13                                                | 0.03                                             | 1.46                                                     | 0.00                                                     | 0.00                                                    | 0.14                                                     | 103.84            |
| A0-8      | 95.43                                     | 0.18                                                | 0.02                                             | 0.29                                                     | 0.26                                                     | 0.00                                                    | 0.13                                                     | 96.31             |
| A0-9      | 99.41                                     | 0.12                                                | 0.03                                             | 0.00                                                     | 0.51                                                     | 0.00                                                    | 0.13                                                     | 100.20            |
| A0-10     | 103.91                                    | 0.13                                                | 0.04                                             | 0.19                                                     | 0.02                                                     | 0.07                                                    | 0.00                                                     | 104.35            |
| A0-11     | 110.02                                    | 0.10                                                | 0.01                                             | 0.03                                                     | 0.22                                                     | 0.27                                                    | 0.00                                                     | 110.65            |
| A0-12     | 107.16                                    | 0.10                                                | 0.01                                             | 0.22                                                     | 0.11                                                     | 0.00                                                    | 0.06                                                     | 107.67            |

Table S2.2.2: Mass balance data for the cellulose isolated with addition of mineral acid.

| Treatment | Cellulose recovered in pulp [%g/g in raw] | Cellulose recovered in primary lignin [%g/g in raw] | Cellulose recovered in wash lignin [%g/g in raw] | Cellulose recovered in prim. Liq. as mono. [%g/g in raw] | Cellulose recovered in prim liq. as polym. [%g/g in raw] | Cellulose recovered in wash Liq. as mono. [%g/g in raw] | Cellulose recovered in wash liq. as polym. [%g/g in raw] | Sum [%g/g in raw] |
|-----------|-------------------------------------------|-----------------------------------------------------|--------------------------------------------------|----------------------------------------------------------|----------------------------------------------------------|---------------------------------------------------------|----------------------------------------------------------|-------------------|
| A20-1     | 81.46                                     | 0.24                                                | 0.03                                             | 9.34                                                     | 2.70                                                     | 1.77                                                    | 0.56                                                     | 96.11             |
| A20-2     | 75.86                                     | 0.16                                                | 0.02                                             | 10.99                                                    | 1.47                                                     | 2.20                                                    | 0.37                                                     | 91.08             |
| A20-3     | 75.77                                     | 0.21                                                | 0.03                                             | 12.21                                                    | 2.03                                                     | 1.56                                                    | 0.00                                                     | 91.80             |
| A20-4     | 83.31                                     | 0.26                                                | 0.22                                             | 9.06                                                     | 4.30                                                     | 1.61                                                    | 0.79                                                     | 99.50             |
| A20-5     | 74.61                                     | 0.36                                                | 0.10                                             | 9.23                                                     | 2.52                                                     | 1.68                                                    | 0.37                                                     | 88.86             |
| A20-6     | 72.62                                     | 0.30                                                | 0.04                                             | 11.07                                                    | 0.00                                                     | 2.09                                                    | 14.06                                                    | 100.19            |
| A20-7     | 73.17                                     | 0.51                                                | 0.19                                             | 7.87                                                     | 5.05                                                     | 0.07                                                    | 2.49                                                     | 89.35             |
| A20-8     | 66.04                                     | 0.34                                                | 0.05                                             | 0.91                                                     | 13.45                                                    | 0.12                                                    | 2.27                                                     | 83.18             |
| A20-9     | 59.76                                     | 0.81                                                | 0.21                                             | 1.52                                                     | 0.73                                                     | 0.56                                                    | 0.21                                                     | 63.79             |
| A20-10    | 68.17                                     | 0.82                                                | 0.07                                             | 1.83                                                     | 0.00                                                     | 0.29                                                    | 2.70                                                     | 73.89             |
| A20-11    | 62.49                                     | 0.27                                                | 0.53                                             | 5.52                                                     | 0.00                                                     | 1.60                                                    | 0.00                                                     | 70.42             |
| A20-12    | 51.92                                     | 0.60                                                | 0.09                                             | 11.12                                                    | 0.00                                                     | 1.99                                                    | 0.00                                                     | 65.72             |

### S2.3 Hemicellulose mass balance

Table S2.3.1: Mass balance data for the hemicellulose isolated without addition of mineral acid.

| Treatment | Hemicell. recovered in pulp [%g/g in raw] | Hemicell. recovered in primary lignin [%g/g in raw] | Hemicell. recovered in wash lignin [%g/g in raw] | Hemicell. recovered in prim. Liq. as mono. [%g/g in raw] | Hemicell. recovered in prim liq. as polym. [%g/g in raw] | Hemicell. recovered in wash Liq. as mono. [%g/g in raw] | Hemicell. recovered in wash liq. as polym. [%g/g in raw] | Sum [%g/g in raw] |
|-----------|-------------------------------------------|-----------------------------------------------------|--------------------------------------------------|----------------------------------------------------------|----------------------------------------------------------|---------------------------------------------------------|----------------------------------------------------------|-------------------|
| A0-1      | 30.51                                     | 0.84                                                | 0.06                                             | 7.03                                                     | 29.75                                                    | 1.01                                                    | 4.30                                                     | 73.49             |
| A0-2      | 35.46                                     | 0.83                                                | 0.08                                             | 7.54                                                     | 24.96                                                    | 5.85                                                    | 0.00                                                     | 74.72             |
| A0-3      | 30.43                                     | 0.96                                                | 0.12                                             | 5.99                                                     | 32.30                                                    | 1.16                                                    | 5.30                                                     | 76.26             |
| A0-4      | 48.02                                     | 1.32                                                | 0.08                                             | 4.43                                                     | 20.18                                                    | 1.20                                                    | 3.55                                                     | 78.78             |
| A0-5      | 47.31                                     | 1.09                                                | 0.10                                             | 4.35                                                     | 21.45                                                    | 0.99                                                    | 4.34                                                     | 79.63             |
| A0-6      | 58.80                                     | 1.30                                                | 0.00                                             | 4.32                                                     | 21.93                                                    | 0.68                                                    | 3.17                                                     | 90.21             |
| A0-7      | 67.59                                     | 1.56                                                | 0.13                                             | 2.98                                                     | 10.32                                                    | 0.70                                                    | 2.74                                                     | 86.03             |
| A0-8      | 66.86                                     | 2.55                                                | 0.12                                             | 2.85                                                     | 13.19                                                    | 0.54                                                    | 2.44                                                     | 88.55             |
| A0-9      | 65.64                                     | 1.45                                                | 0.09                                             | 3.00                                                     | 12.66                                                    | 0.52                                                    | 2.20                                                     | 85.55             |
| A0-10     | 89.23                                     | 0.82                                                | 0.11                                             | 1.93                                                     | 5.44                                                     | 1.63                                                    | 0.00                                                     | 99.15             |
| A0-11     | 95.82                                     | 0.84                                                | 0.04                                             | 2.58                                                     | 4.71                                                     | 2.11                                                    | 0.00                                                     | 106.12            |
| A0-12     | 86.22                                     | 0.96                                                | 0.05                                             | 2.93                                                     | 7.33                                                     | 0.00                                                    | 1.21                                                     | 98.71             |

Table S2.3.2: Mass balance data for the hemicellulose isolated with addition of mineral acid.

| Treatment | Hemicell. recovered in pulp [%g/g in raw] | Hemicell. recovered in primary lignin [%g/g in raw] | Hemicell. recovered in wash lignin [%g/g in raw] | Hemicell. recovered in prim. Liq. as mono. [%g/g in raw] | Hemicell. recovered in prim liq. as polym. [%g/g in raw] | Hemicell. recovered in wash Liq. as mono. [%g/g in raw] | Hemicell. recovered in wash liq. as polym. [%g/g in raw] | Sum [%g/g in raw] |
|-----------|-------------------------------------------|-----------------------------------------------------|--------------------------------------------------|----------------------------------------------------------|----------------------------------------------------------|---------------------------------------------------------|----------------------------------------------------------|-------------------|
| A20-1     | 0.00                                      | 0.26                                                | 0.04                                             | 22.79                                                    | 0.10                                                     | 6.51                                                    | 0.00                                                     | 29.69             |
| A20-2     | 0.00                                      | 0.16                                                | 0.02                                             | 21.92                                                    | 0.04                                                     | 5.96                                                    | 21.74                                                    | 49.84             |
| A20-3     | 0.00                                      | 0.07                                                | 0.02                                             | 15.98                                                    | 0.12                                                     | 3.62                                                    | 0.00                                                     | 19.81             |
| A20-4     | 0.00                                      | 0.13                                                | 0.10                                             | 21.94                                                    | 0.00                                                     | 5.75                                                    | 0.00                                                     | 27.92             |
| A20-5     | 0.00                                      | 0.32                                                | 0.10                                             | 20.69                                                    | 0.26                                                     | 5.61                                                    | 0.00                                                     | 26.98             |
| A20-6     | 0.00                                      | 0.32                                                | 0.02                                             | 20.29                                                    | 0.00                                                     | 5.50                                                    | 16.65                                                    | 42.78             |
| A20-7     | 0.00                                      | 0.36                                                | 0.21                                             | 23.54                                                    | 0.60                                                     | 1.10                                                    | 4.15                                                     | 29.96             |
| A20-8     | 0.00                                      | 0.39                                                | 0.02                                             | 2.42                                                     | 18.38                                                    | 0.41                                                    | 2.50                                                     | 24.12             |
| A20-9     | 0.00                                      | 0.52                                                | 0.18                                             | 2.06                                                     | 0.15                                                     | 1.33                                                    | 0.00                                                     | 4.25              |
| A20-10    | 0.00                                      | 0.61                                                | 0.07                                             | 4.49                                                     | 0.12                                                     | 1.32                                                    | 3.37                                                     | 9.98              |
| A20-11    | 0.00                                      | 0.21                                                | 0.07                                             | 11.09                                                    | 0.57                                                     | 5.68                                                    | 0.00                                                     | 17.63             |
| A20-12    | 0.00                                      | 0.28                                                | 0.06                                             | 16.62                                                    | 0.32                                                     | 6.21                                                    | 0.00                                                     | 23.49             |

*S3 Quaternary carbon content*

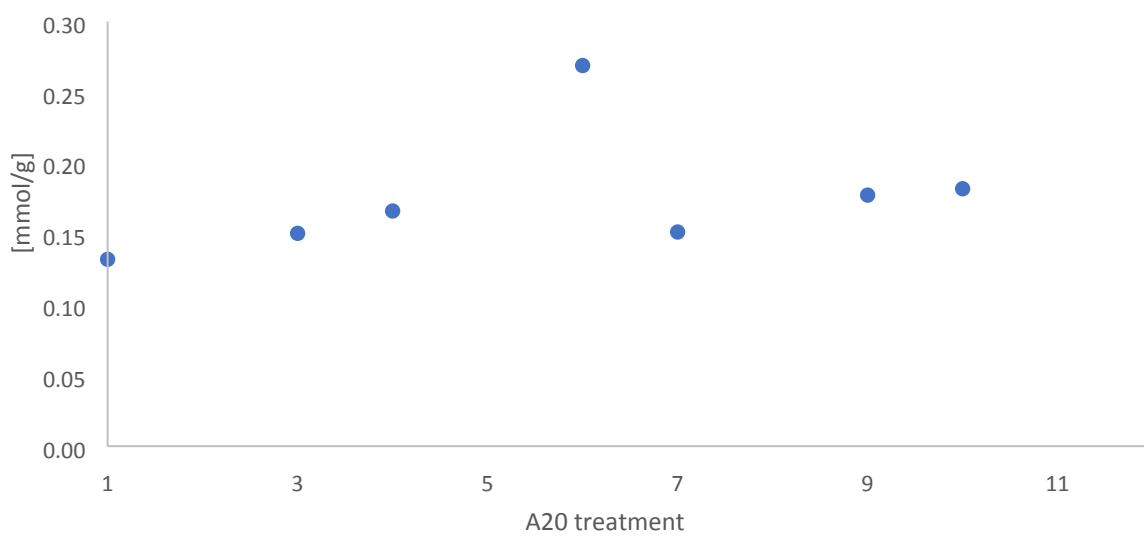

**Figure S1.** Content of quaternary carbon linker (48.5-50.25 ppm) for the various A20 treatments.

S4 Prominent Figures and Tables discussed in manuscript

Table S4.1: Pyr-GC/MS data for selected lignins isolated subsequent acid-free organosolv processing. *N.B.*: names as listed in the NIST database have been used.

| Identified compound                           | Content in samples [% area] |      |      |      |      |      |       |       |
|-----------------------------------------------|-----------------------------|------|------|------|------|------|-------|-------|
|                                               | A0-1                        | A0-3 | A0-4 | A0-6 | A0-7 | A0-9 | A0-10 | A0-12 |
| Furfural                                      | ND                          | ND   | ND   | ND   | ND   | ND   | ND    | ND    |
| 5-HMF                                         | ND                          | ND   | ND   | ND   | ND   | ND   | ND    | ND    |
| Furan, 2-(2-propenyl)-                        | ND                          | ND   | ND   | ND   | ND   | ND   | ND    | ND    |
| 2-Furancarboxaldehyde, 5-methyl-              | ND                          | ND   | ND   | ND   | ND   | ND   | ND    | ND    |
| 3-Buten-2-one, 4-(2-furanyl)-                 | ND                          | 0.20 | ND   | 0.21 | ND   | 0.19 | ND    | 0.20  |
| 1-Heptanone, 1-(2-furanyl)-                   | ND                          | ND   | ND   | ND   | ND   | ND   | ND    | ND    |
| Benzene, 1,2,3,4-tetramethoxy-5-(2-propenyl)- | 1.31                        | 0.84 | 0.51 | 0.25 | 0.59 | ND   | 0.82  | ND    |
| alpha-D-Glucopyranose, 1,6-anhydro            | ND                          | ND   | ND   | ND   | ND   | ND   | ND    | ND    |
| Eugenol (G)                                   | 0.96                        | 0.80 | 0.71 | 0.77 | 1.00 | 0.80 | 0.97  | 0.98  |
| trans-Isoeugenol (G)                          | 2.13                        | 2.14 | 1.54 | 2.26 | 2.02 | 2.00 | 2.29  | 2.47  |
| Vanillin (G)                                  | 2.42                        | 2.53 | 3.97 | 3.19 | 2.70 | 2.94 | 3.78  | 3.42  |
| Apocynin (G)                                  | 1.65                        | 1.89 | 1.49 | 1.90 | 1.37 | 1.63 | 1.77  | 1.86  |
| Benzenepropanol, 4-hydroxy-3-methoxy-(G)      | 0.69                        | 0.64 | 0.76 | 0.63 | ND   | ND   | 0.55  | ND    |
| Butyrovaniillone (G)                          | ND                          | ND   | ND   | ND   | ND   | ND   | ND    | ND    |
| Phenol, 2-methoxy-4-(1-propenyl)-(G)          | ND                          | ND   | ND   | ND   | ND   | ND   | ND    | ND    |
| Phenol, 2,6-dimethoxy-(G)                     | 4.77                        | 4.87 | 4.00 | 4.82 | 3.38 | 3.88 | 4.45  | 4.66  |
| 2-Methoxy-4-vinylphenol (G)                   | 3.94                        | 3.48 | 2.81 | 3.41 | 3.36 | 3.50 | 3.42  | 3.71  |
| Phenol, 4-ethyl-2-methoxy-                    | 1.69                        | 1.63 | 1.60 | 1.93 | 1.59 | 1.64 | 1.81  | 1.78  |

|                                                           |           |           |           |           |           |           |           |           |
|-----------------------------------------------------------|-----------|-----------|-----------|-----------|-----------|-----------|-----------|-----------|
| <b>(G)</b>                                                |           |           |           |           |           |           |           |           |
| <b>Phenol, 2-methoxy-(G)</b>                              | 2.11      | 2.08      | 1.83      | 2.37      | 2.09      | 2.07      | 2.32      | 2.45      |
| <b>trans-Sinapyl alcohol (S)</b>                          | 3.12      | 3.44      | 2.49      | 0.99      | 1.49      | 1.30      | 2.01      | 1.79      |
| <b>(E)-2,6-Dimethoxy-4-(prop-1-en-1-yl)phenol (S)</b>     | 1.64      | 1.60      | 0.95      | 1.47      | 1.19      | 0.95      | 1.10      | 1.16      |
| <b>Butylsyringone (S)</b>                                 | ND        | 0.63      | ND        | 0.57      | ND        | ND        | 0.60      | 0.52      |
| <b>Phenol, 4-ethenyl-2,6-dimethoxy-(S)</b>                | 4.32      | 5.23      | 4.40      | 4.54      | 3.30      | 3.96      | 4.18      | 4.19      |
| <b>3,5-Dimethoxy-4-hydroxytoluene (S)</b>                 | 4.16      | 4.32      | 2.91      | 4.22      | 3.05      | 2.80      | 3.01      | 3.30      |
| <b>Phenol, 2,6-dimethoxy-4-(2-propenyl)-(S)</b>           | 2.57      | 2.76      | 2.01      | 2.50      | 1.87      | 1.72      | 2.07      | 2.07      |
| <b>(E)-2,6-Dimethoxy-4-(prop-1-en-1-yl)phenol (S)</b>     | 5.70      | 5.88      | 4.79      | 5.45      | 3.89      | 3.87      | 4.46      | 4.58      |
| <b>Benzaldehyde, 4-hydroxy-3,5-dimethoxy-(S)</b>          | 5.93      | 6.85      | 8.20      | 6.81      | 4.27      | 4.47      | 6.42      | 5.76      |
| <b>Ethanone, 1-(4-hydroxy-3,5-dimethoxyphenyl)-(S)</b>    | 3.44      | 3.57      | 2.82      | 3.19      | 2.21      | 2.27      | 2.80      | 2.70      |
| <b>Syringylacetone (S)</b>                                | 0.88      | 0.94      | 0.92      | 0.93      | 0.73      | 2.97      | 1.09      | 0.98      |
| <b>1-Propanone, 1-(4-hydroxy-3,5-dimethoxyphenyl)-(S)</b> | 1.11      | 1.29      | 0.74      | 1.13      | 0.83      | 0.78      | 0.89      | 0.85      |
| <b>Creosol</b>                                            | 3.17      | 3.01      | 2.37      | 3.25      | 2.68      | 2.85      | 2.55      | 3.01      |
| <b>Methylated (2/3) phenol</b>                            | 1.54      | 1.48      | 1.54      | 1.93      | 1.65      | 1.66      | 1.61      | 1.84      |
| <b>Phenol, 4-propyl-</b>                                  | ND        | ND        | ND        | ND        | ND        | ND        | ND        | ND        |
| <b>Formic acid, 2,3-dimethylphenyl ester</b>              | 0.54      | 0.51      | ND        | 0.68      | ND        | 0.93      | 0.69      | ND        |
| <b>(G:S:H)</b>                                            | (35:62:3) | (33:65:3) | (35:62:3) | (37:60:4) | (41:55:4) | (39:57:4) | (39:58:3) | (40:57:4) |

ND: indicates that a compound is below detection limit of %area = 0.5.

%area: Corresponding area for a compound relative to the sum of all the signal areas in the chromatogram.



Table S4.2: Pyr-GC/MS data for selected lignins isolated from acid-catalyzed organosolv processing.  
*N.B.*: names as listed in the NIST database have been used.

| Identified compound                                                                               | Content in samples [%A] |       |       |       |       |       |        |        |
|---------------------------------------------------------------------------------------------------|-------------------------|-------|-------|-------|-------|-------|--------|--------|
|                                                                                                   | A20-1                   | A20-3 | A20-4 | A20-6 | A20-7 | A20-9 | A20-10 | A20-12 |
| Furfural                                                                                          | 2.29                    | 2.98  | 2.91  | 4.97  | 4.43  | 4.91  | 5.36   | 3.71   |
| 5-HMF                                                                                             | 0.79                    | 1.09  | 1.66  | 2.01  | 4.35  | 4.08  | 7.30   | 4.31   |
| Furan, 2-(2-propenyl)-                                                                            | ND                      | 1.26  | ND    | 1.10  | ND    | 1.62  | ND     | 1.27   |
| 2-Furancarboxaldehyde, 5-methyl-                                                                  | ND                      | 0.76  | 0.57  | 0.79  | 1.16  | 1.48  | 1.68   | 0.94   |
| 3-Buten-2-one, 4-(2-furanyl)-                                                                     | ND                      | 3.99  | ND    | 4.09  | ND    | 5.46  | ND     | 3.80   |
| 1-Heptanone, 1-(2-furanyl)-                                                                       | ND                      | ND    | ND    | ND    | ND    | ND    | 0.27   | ND     |
| 4,5,6-Trimethoxy-7-methyl-3H-2-benzofuran-1-one;<br>Benzene, 1,2,3,4-tetramethoxy-5-(2-propenyl)- | ND                      | ND    | ND    | ND    | ND    | ND    | ND     | ND     |
| alpha-D-Glucopyranose, 1,6-anhydro                                                                | 0.63                    | ND    | ND    | ND    | 0.77  | ND    | 0.74   | 0.98   |
| Eugenol (G)                                                                                       | 0.76                    | 0.54  | 0.74  | 0.64  | 0.65  | ND    | ND     | ND     |
| trans-Isoeugenol (G)                                                                              | ND                      | ND    | ND    | ND    | ND    | ND    | ND     | ND     |
| Vanillin (G)                                                                                      | 2.47                    | 2.27  | 2.56  | 3.06  | 2.11  | 1.62  | 2.09   | 1.74   |
| Apocynin (G)                                                                                      | 1.94                    | 1.94  | 1.73  | 2.27  | 1.56  | 1.43  | 1.45   | 1.30   |
| Benzenepropanol, 4-hydroxy-3-methoxy- (G)                                                         | 0.82                    | 0.56  | 0.51  | 0.56  | 0.54  | 0.51  | ND     | 1.12   |
| Butyrovanillone (G)                                                                               | 1.64                    | 1.44  | 2.08  | 2.04  | 2.28  | 1.09  | 2.46   | 1.51   |
| Phenol, 2-methoxy-4-(1-propenyl)- (G)                                                             | 0.66                    | 0.58  | 0.58  | 0.54  | 0.78  | 0.53  | 0.74   | 0.53   |
| Phenol, 2,6-dimethoxy- (G)                                                                        | 5.86                    | 4.59  | 5.85  | 4.27  | 5.05  | 3.29  | 4.71   | 3.19   |
| 2-Methoxy-4-vinylphenol (G)                                                                       | 3.04                    | 1.69  | 3.09  | 1.87  | 2.52  | 1.40  | 2.26   | 1.34   |
| Phenol, 4-ethyl-2-methoxy- (G)                                                                    | 1.77                    | 1.57  | 1.92  | 1.44  | 1.88  | 1.07  | 1.72   | 0.94   |
| Phenol, 2-methoxy- (G)                                                                            | 3.58                    | 2.81  | 3.37  | 2.73  | 3.73  | 2.53  | 3.29   | 2.21   |
| trans-Sinapyl alcohol (S)                                                                         | ND                      | ND    | ND    | ND    | ND    | ND    | ND     | ND     |
| (E)-2,6-Dimethoxy-4-(prop-1-en-1-yl)phenol (S)                                                    | ND                      | ND    | ND    | ND    | ND    | ND    | ND     | ND     |
| Butylsyringone (S)                                                                                | 1.30                    | 1.24  | 1.52  | 1.40  | 1.44  | 0.93  | 1.46   | 1.24   |
| Phenol, 4-ethenyl-2,6-dimethoxy- (S)                                                              | 2.11                    | 1.84  | 1.74  | 1.79  | 1.53  | 1.19  | 1.34   | 1.18   |
| 3,5-Dimethoxy-4-hydroxytoluene (S)                                                                | 4.79                    | 3.97  | 4.19  | 4.07  | 4.36  | 3.13  | 4.35   | 2.75   |
| Phenol, 2,6-dimethoxy-4-(2-propenyl)- (S)                                                         | 0.71                    | 0.73  | 0.85  | 0.81  | 0.74  | 0.61  | 0.78   | 0.61   |
| (E)-2,6-Dimethoxy-4-(prop-1-en-1-yl)phenol (S)                                                    | 1.98                    | 1.27  | 1.21  | 1.21  | 1.50  | 0.99  | 1.38   | 1.24   |
| Benzaldehyde, 4-hydroxy-3,5-dimethoxy- (S)                                                        | 2.51                    | 2.57  | 2.94  | 2.86  | 2.15  | 1.70  | 1.98   | 2.45   |
| Ethanone, 1-(4-hydroxy-3,5-dimethoxyphenyl)- (S)                                                  | 3.40                    | 2.39  | 3.27  | 2.35  | 2.05  | 2.11  | 1.65   | 2.42   |
| Syringylacetone (S)                                                                               | 1.35                    | 1.29  | 1.48  | 1.31  | 2.01  | 1.76  | 2.10   | 1.98   |

|                                                            |           |           |           |           |           |           |           |           |
|------------------------------------------------------------|-----------|-----------|-----------|-----------|-----------|-----------|-----------|-----------|
| <b>1-Propanone, 1-(4-hydroxy-3,5-dimethoxyphenyl)- (S)</b> | 0.88      | 0.72      | 0.57      | 0.75      | 0.64      | 0.57      | 0.58      | 0.82      |
| <b>Creosol</b>                                             | 4.52      | 3.39      | 4.32      | 3.82      | 5.15      | 0.37      | 4.86      | 2.58      |
| <b>Methylated (2/3) phenol</b>                             | 2.30      | 2.55      | 2.40      | 1.34      | 2.68      | 2.26      | 2.68      | 1.23      |
| <b>Phenol, 4-propyl-</b>                                   | ND        | ND        | ND        | 1.18      | ND        | 1.43      | ND        | 0.97      |
| <b>Formic acid, 2,3-dimethylphenyl ester</b>               | ND        | 0.59      | ND        | ND        | 0.57      | 0.38      | ND        | ND        |
| <b>(G:S:H)</b>                                             | (45:50:5) | (43:51:6) | (45:50:5) | (47:50:3) | (48:46:6) | (37:55:8) | (46:47:7) | (41:55:4) |

ND: indicates that a compound is below detection limit of %area = 0.5.

%area: Corresponding area for a compound relative to the sum of all the signal areas in the chromatogram.

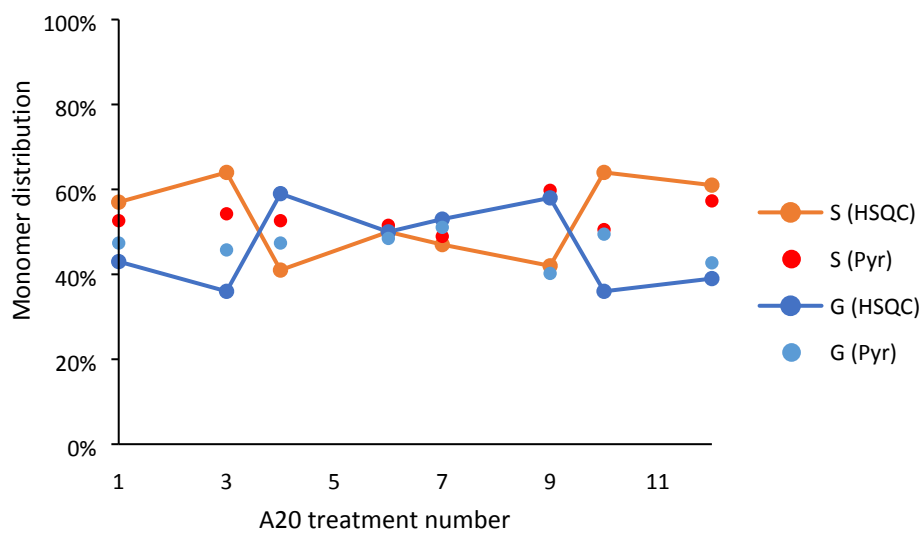

**Figure S2.** Lignin monomer ratios obtained through HSQC analyses and pyr-GC/MS.

Table S4.3: Dehydration products measured in the liquors isolated from non-acid catalyzed treatments.

| Treatment | Furfural<br>[g/100g <sub>biomass</sub> ] | HMF<br>[g/100g <sub>biomass</sub> ] | Formic acid<br>[g/100g <sub>biomass</sub> ] | Acetic acid<br>[g/100g <sub>biomass</sub> ] | Tot. Phenolics<br>[g/100g <sub>biomass</sub> ] |
|-----------|------------------------------------------|-------------------------------------|---------------------------------------------|---------------------------------------------|------------------------------------------------|
| A0-1      | 0.10                                     | 0.06                                | 0.00                                        | 1.89                                        | 0.09                                           |
| A0-2      | 0.07                                     | 0.05                                | 0.23                                        | 1.62                                        | 0.09                                           |
| A0-3      | 0.07                                     | 0.05                                | 0.39                                        | 1.65                                        | 0.08                                           |
| A0-4      | 0.04                                     | 0.04                                | 0.08                                        | 1.42                                        | 0.07                                           |
| A0-5      | 0.05                                     | 0.04                                | 0.12                                        | 1.71                                        | 0.08                                           |
| A0-6      | 0.05                                     | 0.03                                | 0.21                                        | 1.61                                        | 0.09                                           |
| A0-7      | 0.03                                     | 0.02                                | 0.14                                        | 1.18                                        | 0.06                                           |
| A0-8      | 0.02                                     | 0.02                                | 0.28                                        | 1.19                                        | 0.06                                           |
| A0-9      | 0.03                                     | 0.02                                | 0.41                                        | 1.33                                        | 0.08                                           |
| A0-10     | 0.02                                     | 0.02                                | 0.15                                        | 1.03                                        | 0.07                                           |
| A0-11     | 0.02                                     | 0.02                                | 0.18                                        | 0.17                                        | 0.08                                           |
| A0-12     | 0.02                                     | 0.02                                | 0.28                                        | 2.20                                        | 0.11                                           |

<sup>a</sup>Levulinic acid was not detected.

Table S4.4: Dehydration products measured in the liquors isolated from acid catalyzed treatments.

| Treatment | Furfural<br>[g/100g <sub>biomass</sub> ] | HMF<br>[g/100g <sub>biomass</sub> ] | Formic acid<br>[g/100g <sub>biomass</sub> ] | Acetic acid<br>[g/100g <sub>biomass</sub> ] | Tot. Phenolics<br>[g/100g <sub>biomass</sub> ] |
|-----------|------------------------------------------|-------------------------------------|---------------------------------------------|---------------------------------------------|------------------------------------------------|
| A20-1     | 0.76                                     | 0.70                                | 0.47                                        | 2.73                                        | 0.13                                           |
| A20-2     | 1.02                                     | 0.69                                | 0.91                                        | 3.14                                        | 0.13                                           |
| A20-3     | 1.13                                     | 1.03                                | 1.72                                        | 3.69                                        | 0.13                                           |
| A20-4     | 0.65                                     | 0.66                                | 0.71                                        | 2.40                                        | 0.10                                           |
| A20-5     | 0.93                                     | 0.83                                | 1.18                                        | 2.64                                        | 0.13                                           |
| A20-6     | 0.72                                     | 0.89                                | 1.41                                        | 3.09                                        | 0.12                                           |
| A20-7     | 0.69                                     | 0.57                                | 0.85                                        | 1.80                                        | 0.09                                           |
| A20-8     | 0.94                                     | 0.93                                | 0.35                                        | 0.16                                        | 0.12                                           |
| A20-9     | 1.17                                     | 1.56                                | 0.68                                        | 0.36                                        | 0.13                                           |
| A20-10    | 0.20                                     | 1.10                                | 0.00                                        | 0.28                                        | 0.04                                           |
| A20-11    | 0.88                                     | 0.88                                | 0.46                                        | 0.58                                        | 0.10                                           |
| A20-12    | 0.93                                     | 1.25                                | 0.33                                        | 1.34                                        | 0.11                                           |

<sup>a</sup>Levulinic acid was not detected.

## S5 Assigned NMR shifts

Table S5.1: Shifts assigned for NMR analysis.

| Motif                                    | <sup>13</sup> C            | <sup>1</sup> H |
|------------------------------------------|----------------------------|----------------|
| G <sub>2</sub> <sup>1</sup>              | 110.15                     | 6.93           |
| G <sub>6</sub> <sup>1</sup>              | 119.05-<br>120.76          | 6.53-<br>6.78  |
| S <sub>2,6</sub>                         | 103.42                     | 6.62           |
| -OMe                                     | 56.5-55.0                  | -              |
| Quat. Phe C-OMe                          | 148.5-145.0<br>151.0-153.5 | -<br>-         |
| <b>β-O-4' to G</b>                       |                            |                |
| (C <sub>α</sub> )                        | 71.29                      | 4.91           |
| (C <sub>β</sub> )                        | 83.21                      | 4.34           |
| (C <sub>γ</sub> )                        | 59.91                      | 3.24           |
| <b>β-O-4' to S</b>                       |                            |                |
| (C <sub>α</sub> )                        | 72.06                      | 4.89           |
| (C <sub>β</sub> )                        | 85.92                      | 4.13           |
| (C <sub>γ</sub> )                        | 59.43                      | 3.41           |
| <b>β-β'</b>                              |                            |                |
| (C <sub>α</sub> )                        | 87.03                      | 5.44           |
| (C <sub>β</sub> )                        | 53.05                      | 3.48           |
| (C <sub>γ</sub> )                        | 62.97                      | 3.63           |
| <b>β-5'</b>                              |                            |                |
| (C <sub>α</sub> )                        | 85.16                      | 4.63           |
| (C <sub>β</sub> )                        | 53.52                      | 3.07           |
| (C <sub>γ</sub> )                        | 70.88/71.05                | 4.19/3.81      |
| <b>β-D-Xylopyr.</b>                      |                            |                |
| (C <sub>1</sub> )                        | 101.83                     | 4.29           |
| (C <sub>2</sub> )                        | 72.51                      | 3.06           |
| (C <sub>3</sub> )                        | 73.95                      | 3.27           |
| (C <sub>4</sub> )                        | 75.42                      | 3.53           |
| (C <sub>5</sub> )                        | 64.52                      | 3.45           |
| BE                                       | 80.87                      | 4.59           |
| Furan C <sub>4</sub> type 1              | 106.38                     | 7.28           |
| Furan C <sub>4</sub> type 2              | 122.86                     | 7.53           |
| Furan C <sub>3</sub> type 2 <sup>1</sup> | 112.75                     | 6.77           |
| Furan C <sub>3</sub> type 1              | 106.07                     | 6.51           |
| Ketone                                   | 207.2-206.5                | -              |
| Ester                                    | 170.5-169.0                | -              |
| Furan aldehyde                           | 178.5-177.9                | -              |

<sup>1</sup>A20 lignins show expanded guaiacyl shifts. Full range given for G<sub>6</sub> whereas G<sub>2</sub> overlaps with Furan C<sub>3</sub> type 2.

**Spectroscopic data**

**A0-1**

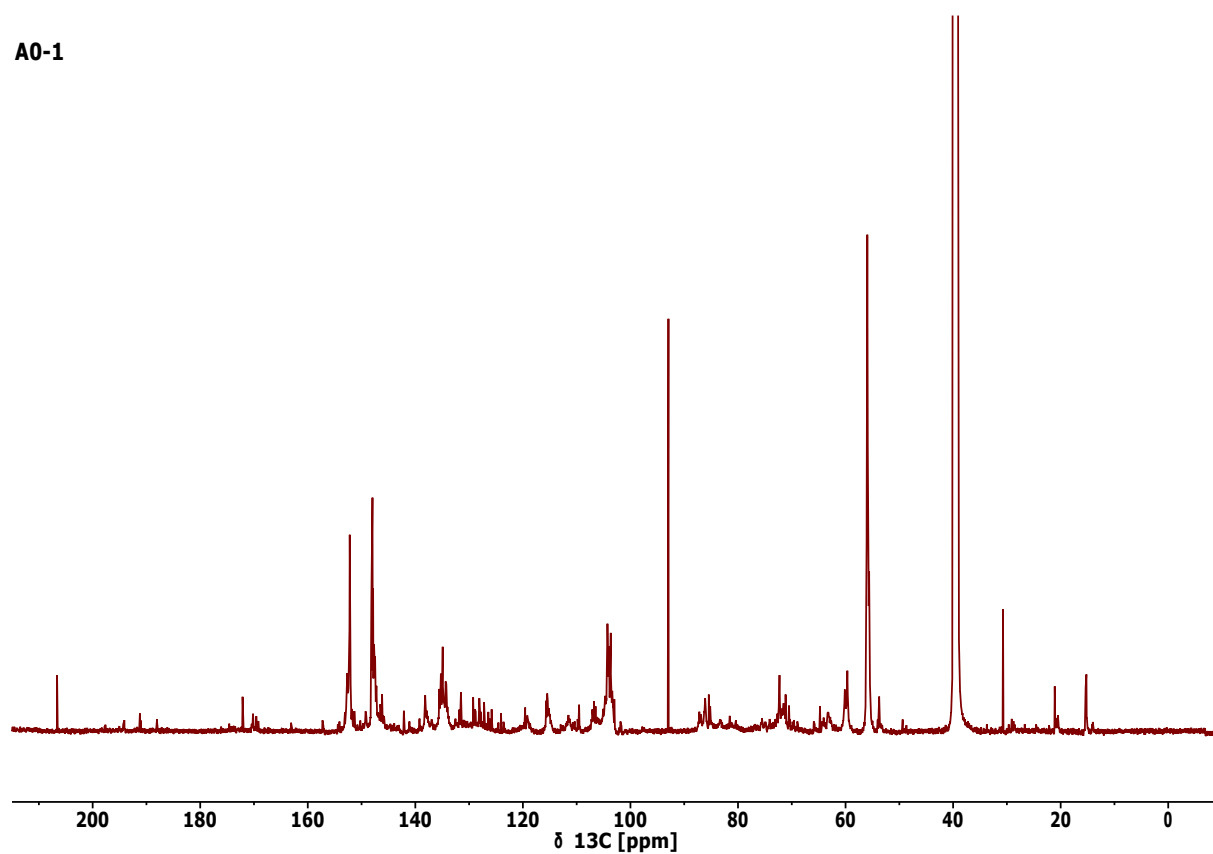

**A0-1**

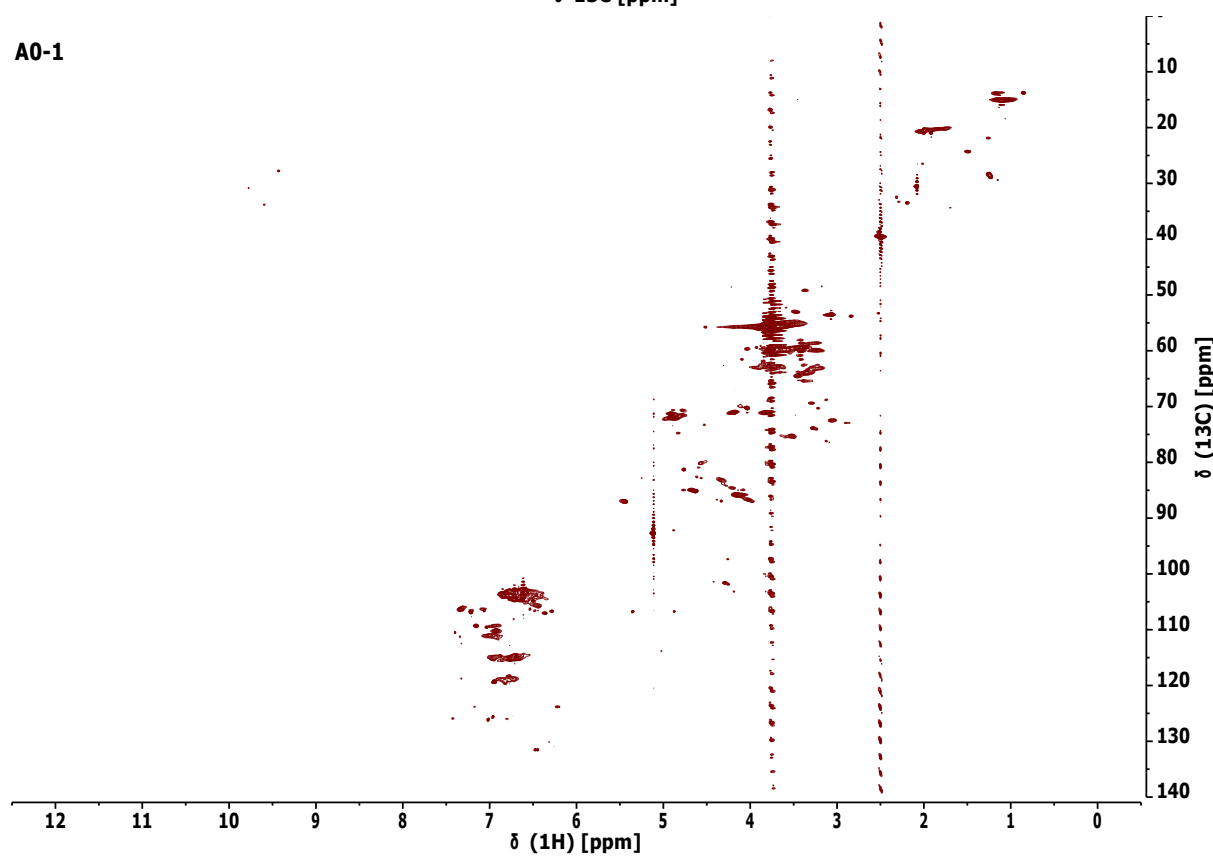

**Figure S3.** The  $^{13}\text{C}$  (top) and HSQC (bottom) spectra for lignin sample **A0-1**.

A0-3

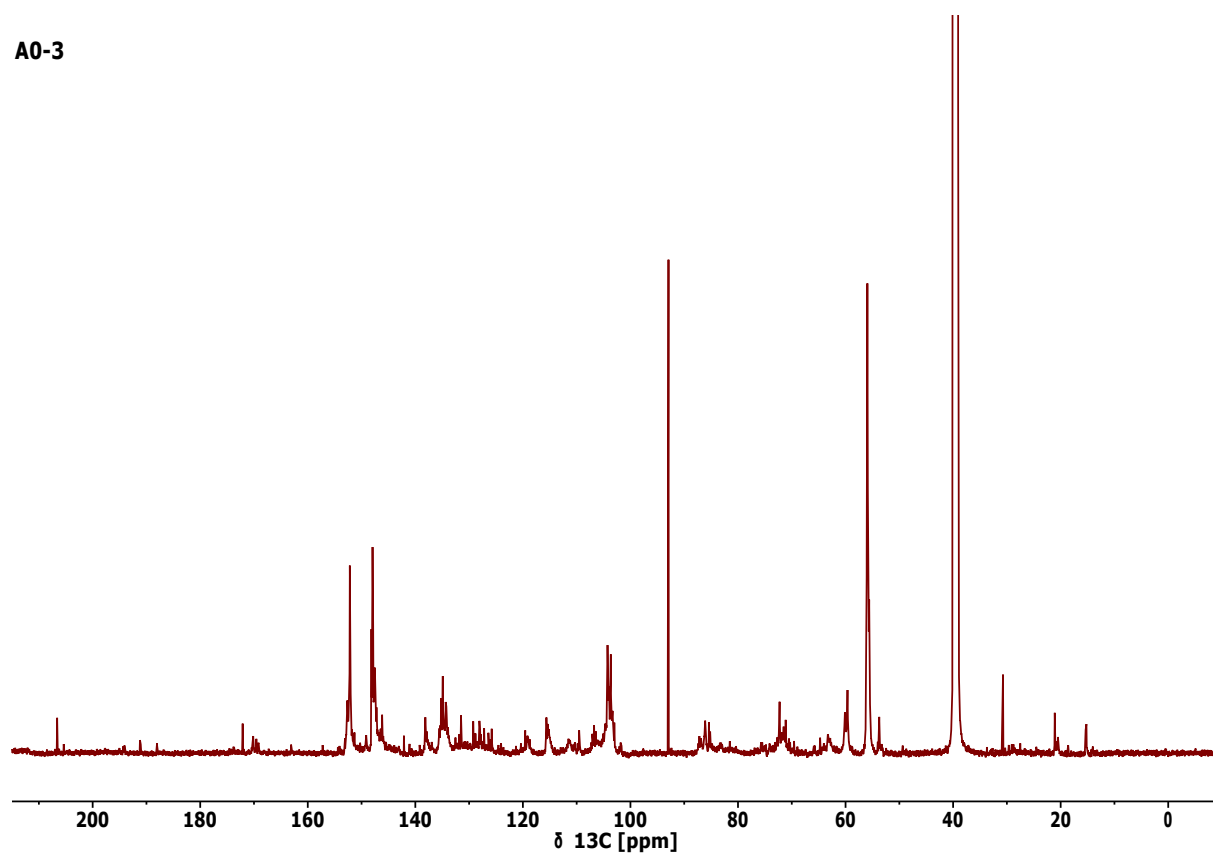

A0-3

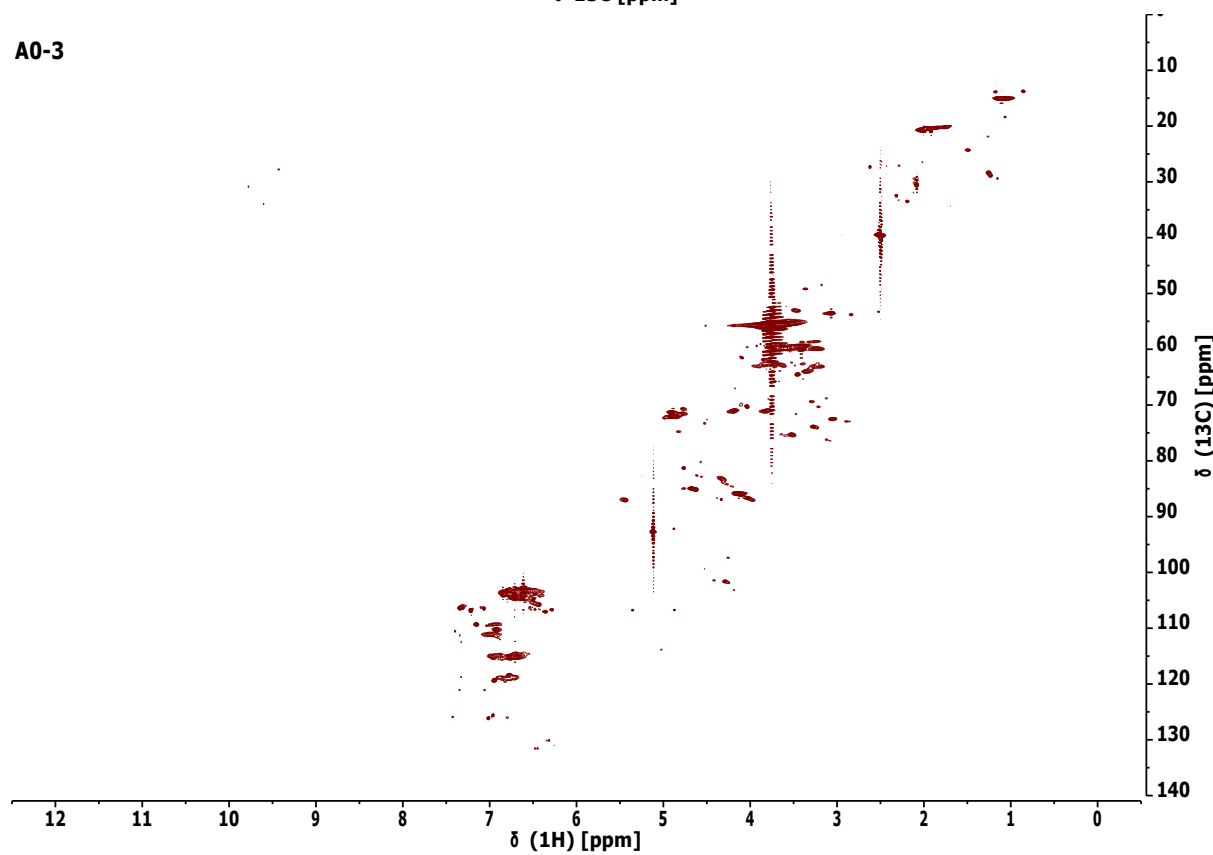

**Figure S4.** The  $^{13}\text{C}$  (top) and HSQC (bottom) spectra for lignin sample A0-3.

A0-4

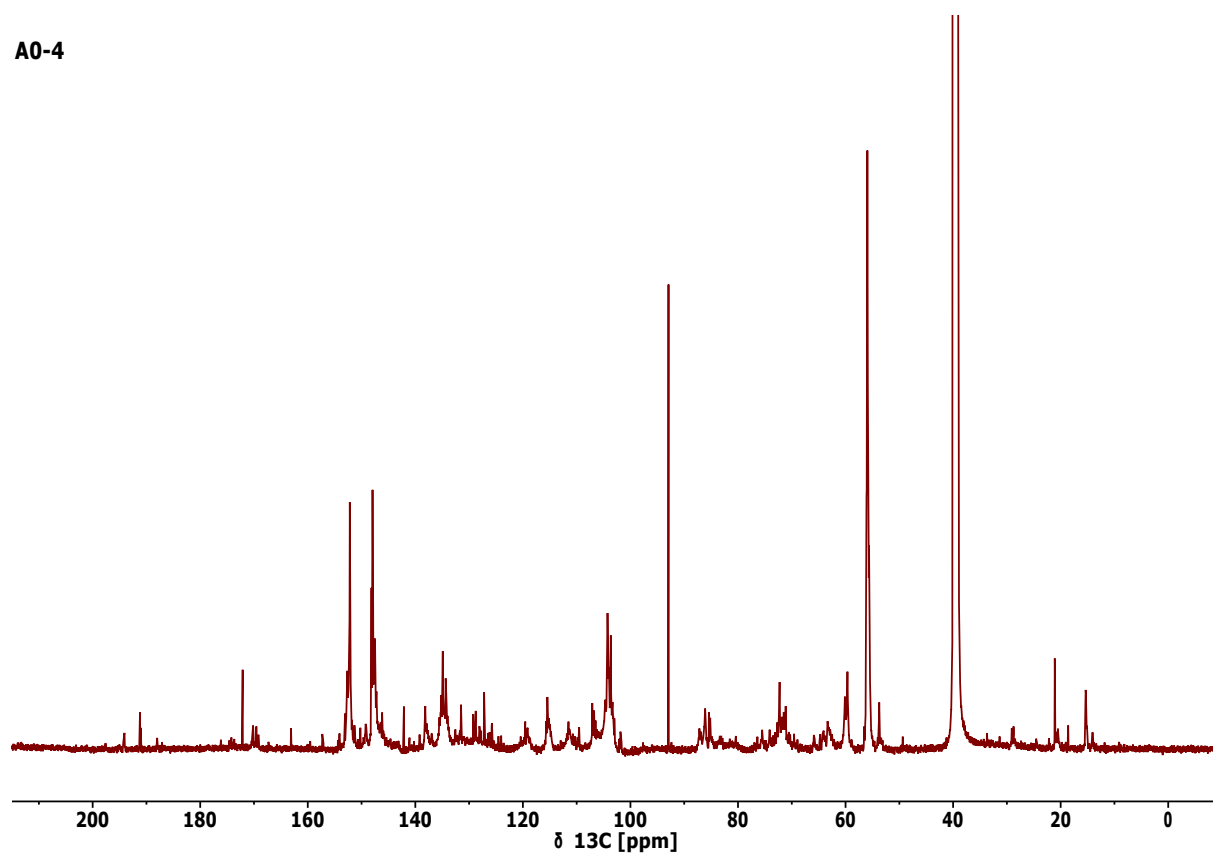

A0-4

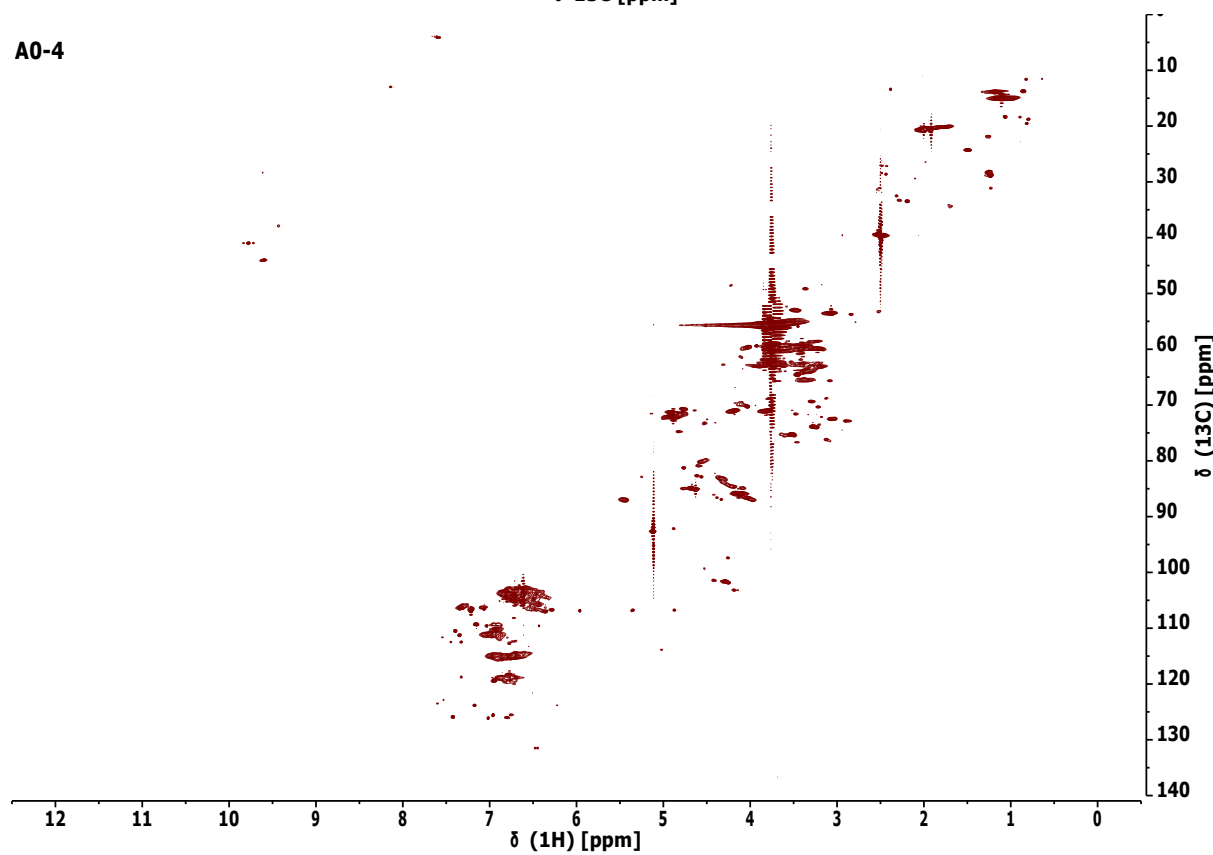

**Figure S5.** The  $^{13}\text{C}$  (top) and HSQC (bottom) spectra for lignin sample A0-4.

A0-6

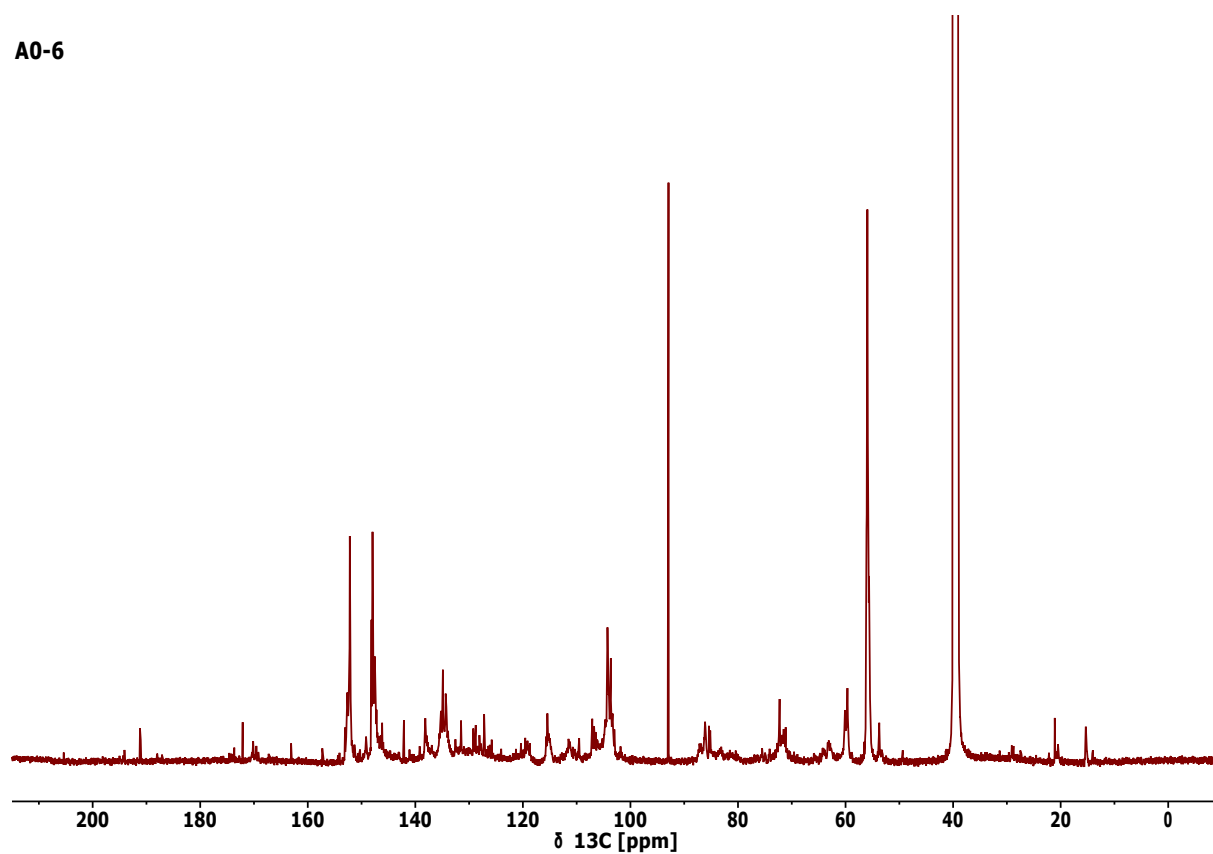

A0-6

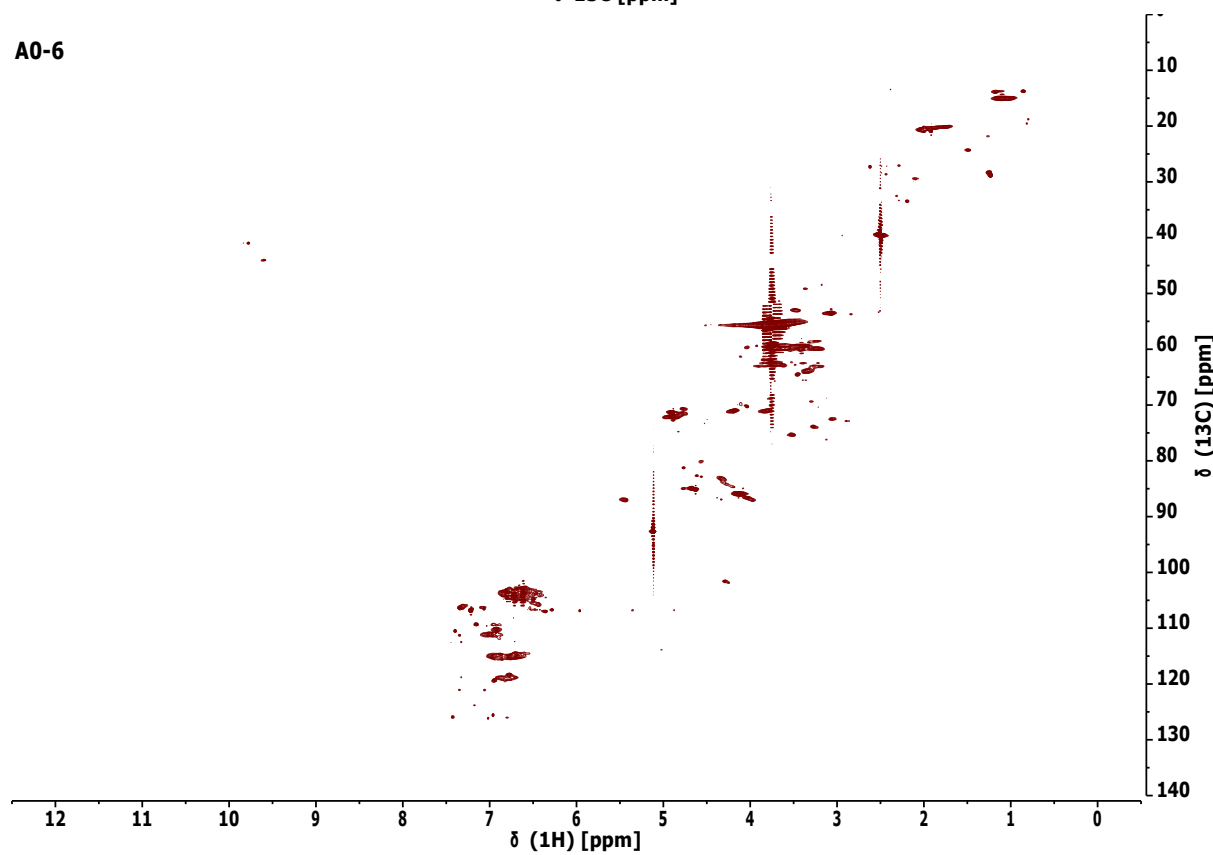

**Figure S6.** The  $^{13}\text{C}$  (top) and HSQC (bottom) spectra for lignin sample A0-6.



A0-7

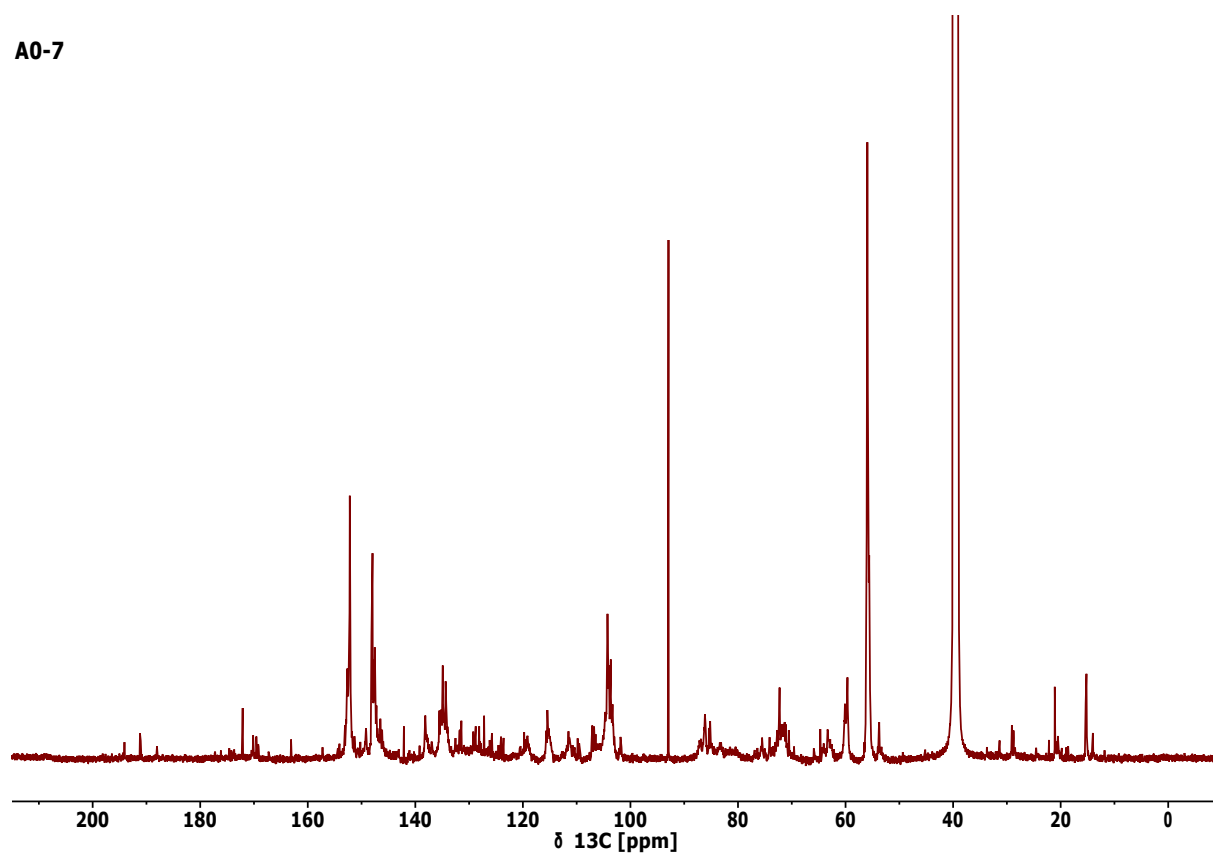

A0-7

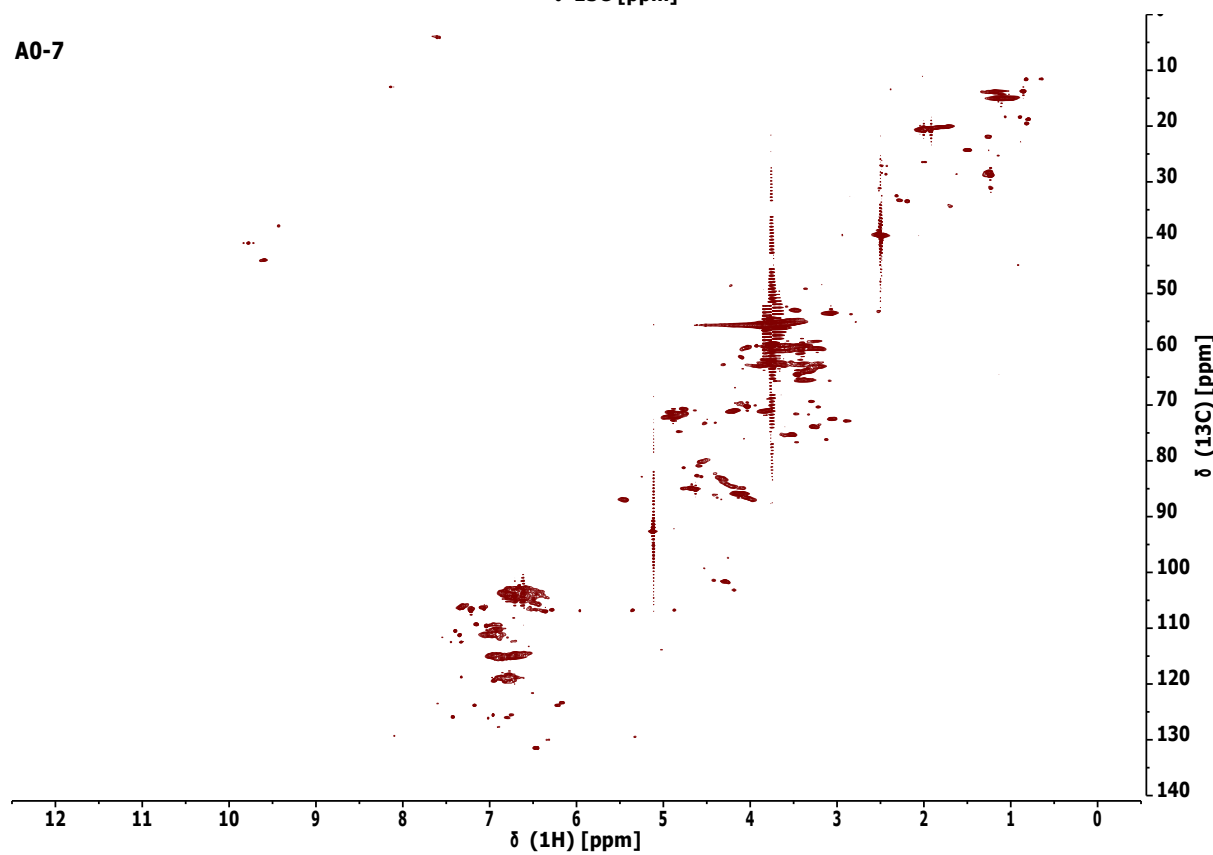

**Figure S7.** The  $^{13}\text{C}$  (top) and HSQC (bottom) spectra for lignin sample A0-7.

A0-9

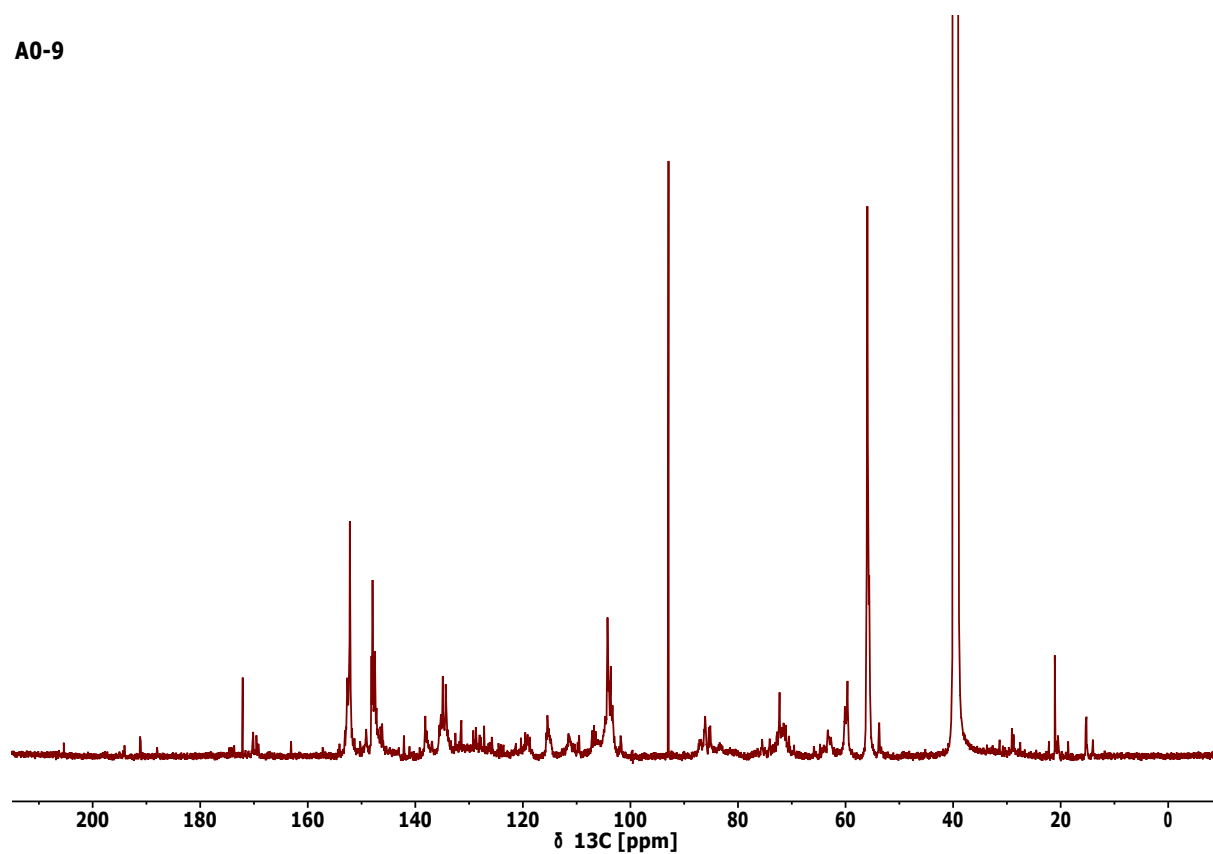

A0-9

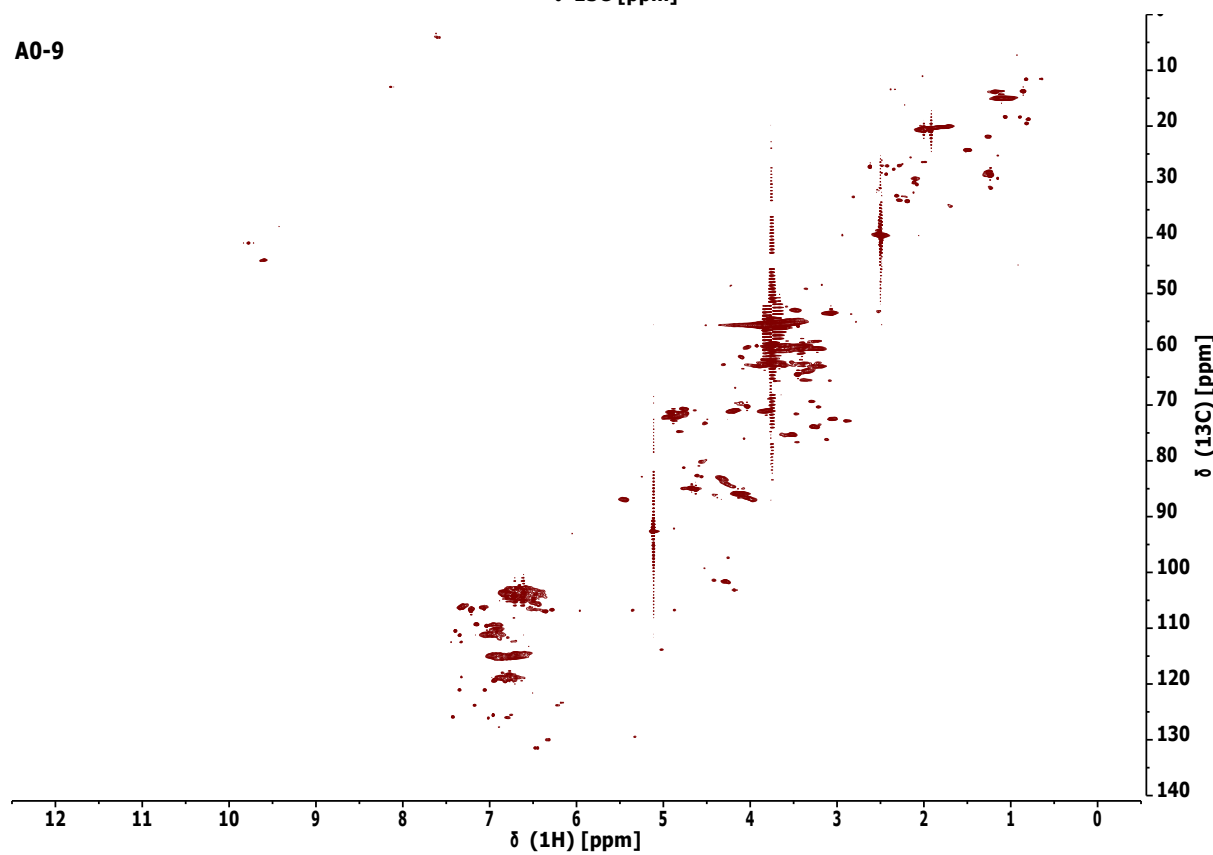

**Figure S8.** The  $^{13}\text{C}$  (top) and HSQC (bottom) spectra for lignin sample A0-9.

A0-10

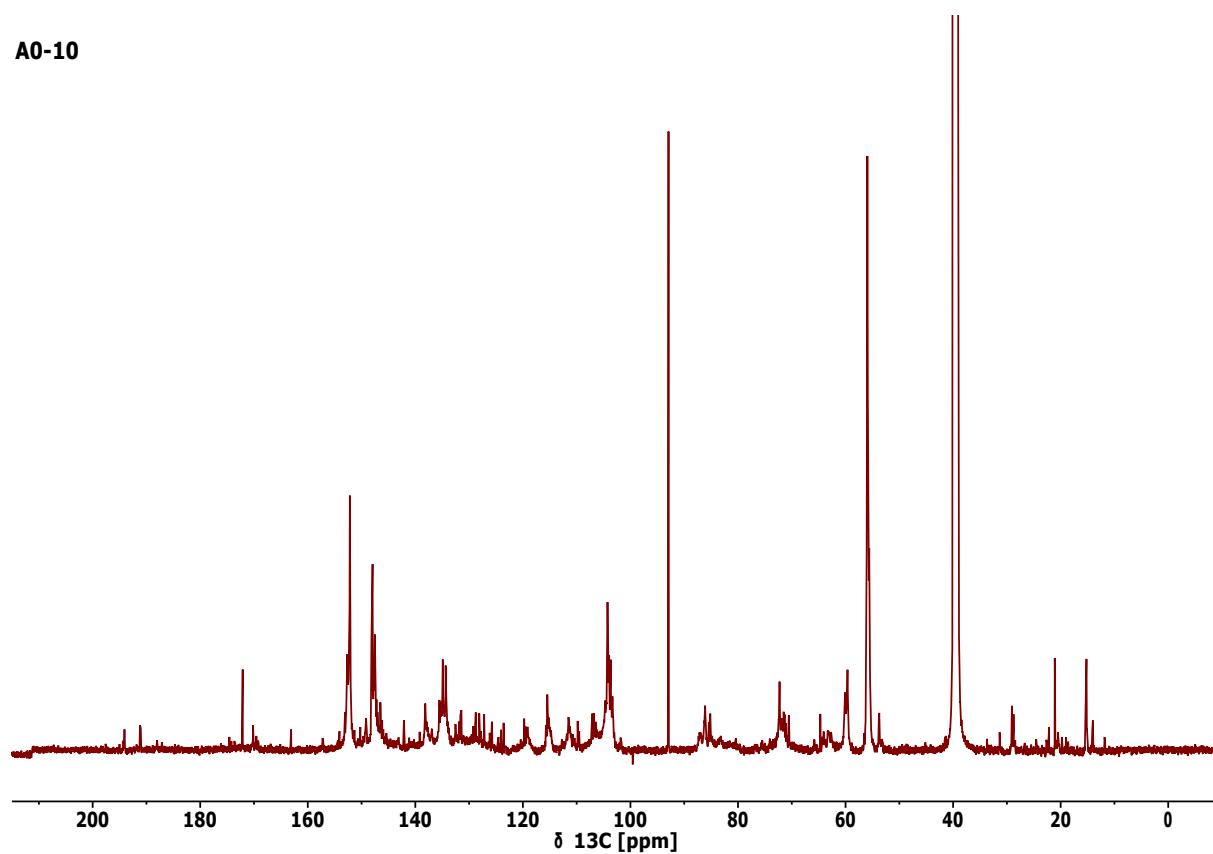

A0-10

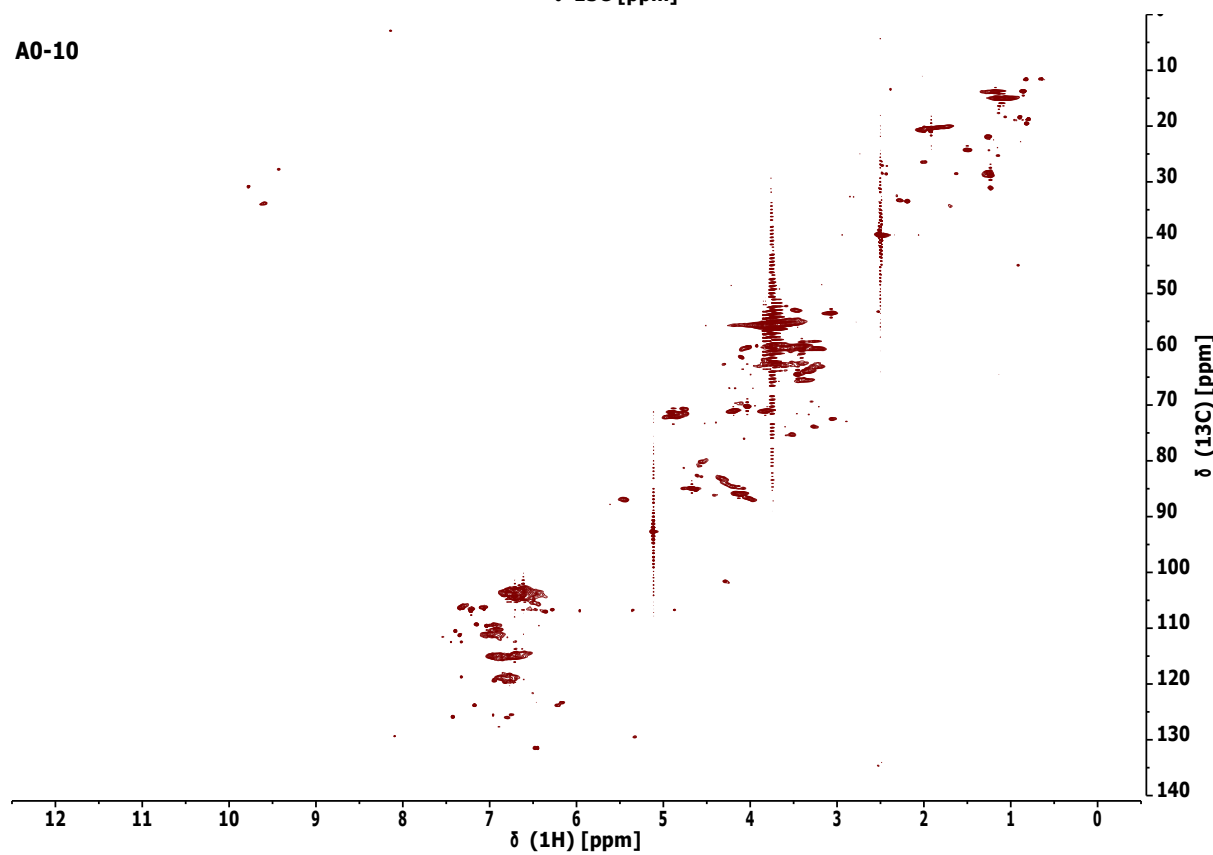

**Figure S9.** The  $^{13}\text{C}$  (top) and HSQC (bottom) spectra for lignin sample A0-10.

A0-12

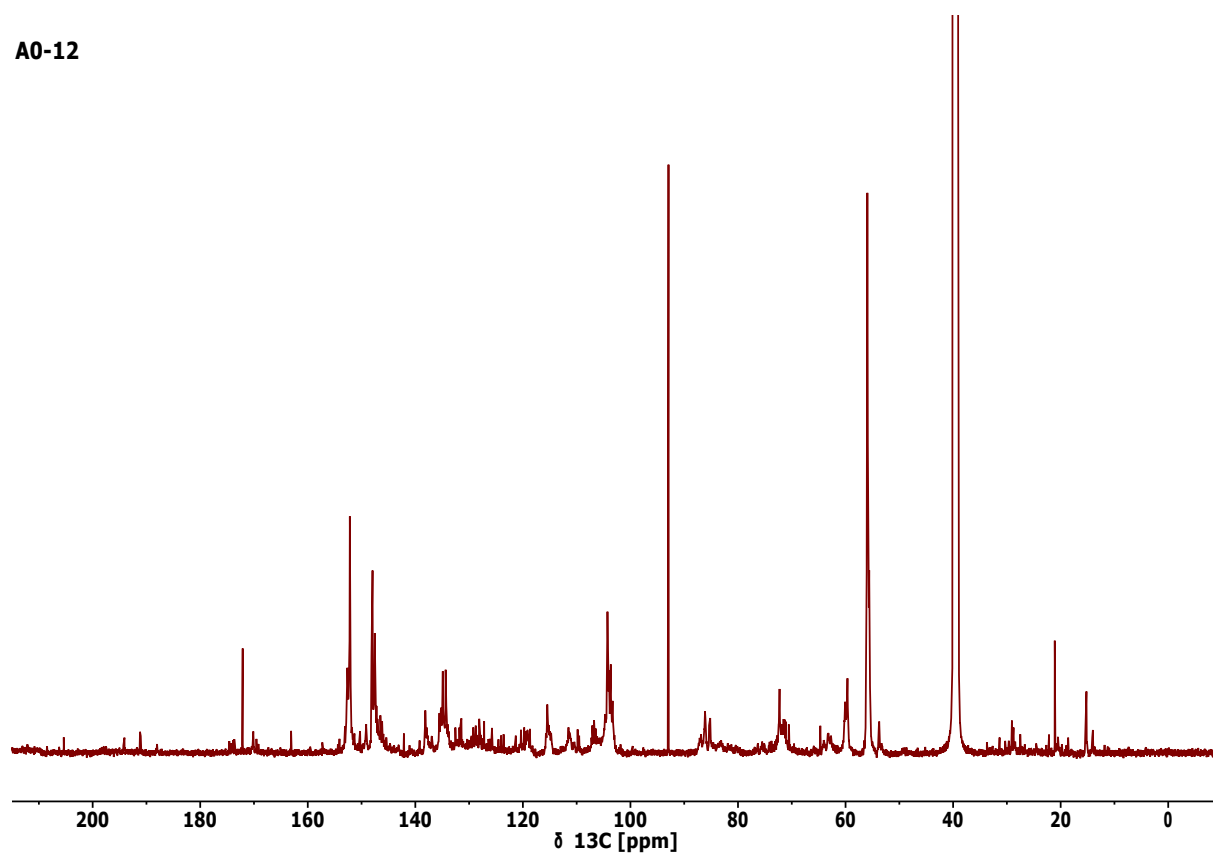

A0-12

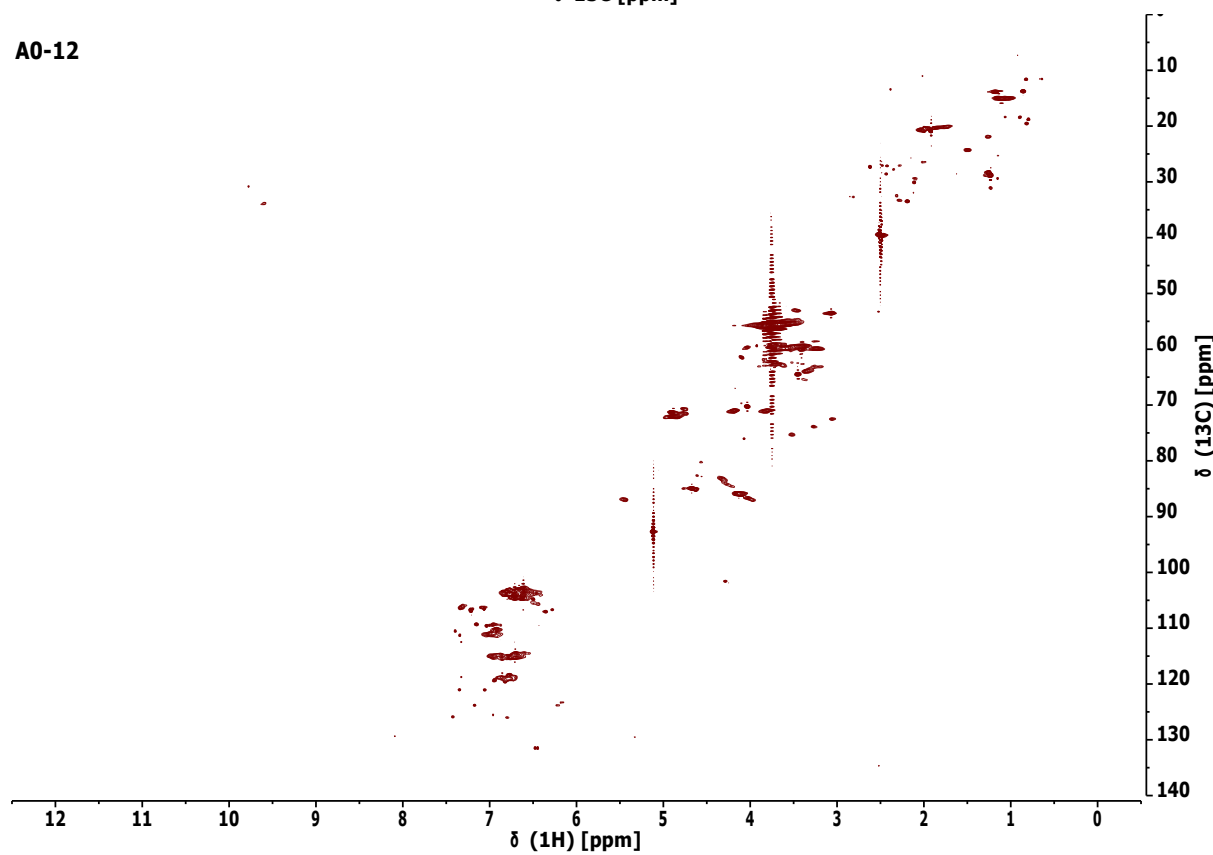

**Figure S10.** The  $^{13}\text{C}$  (top) and HSQC (bottom) spectra for lignin sample A0-12.

A20-1

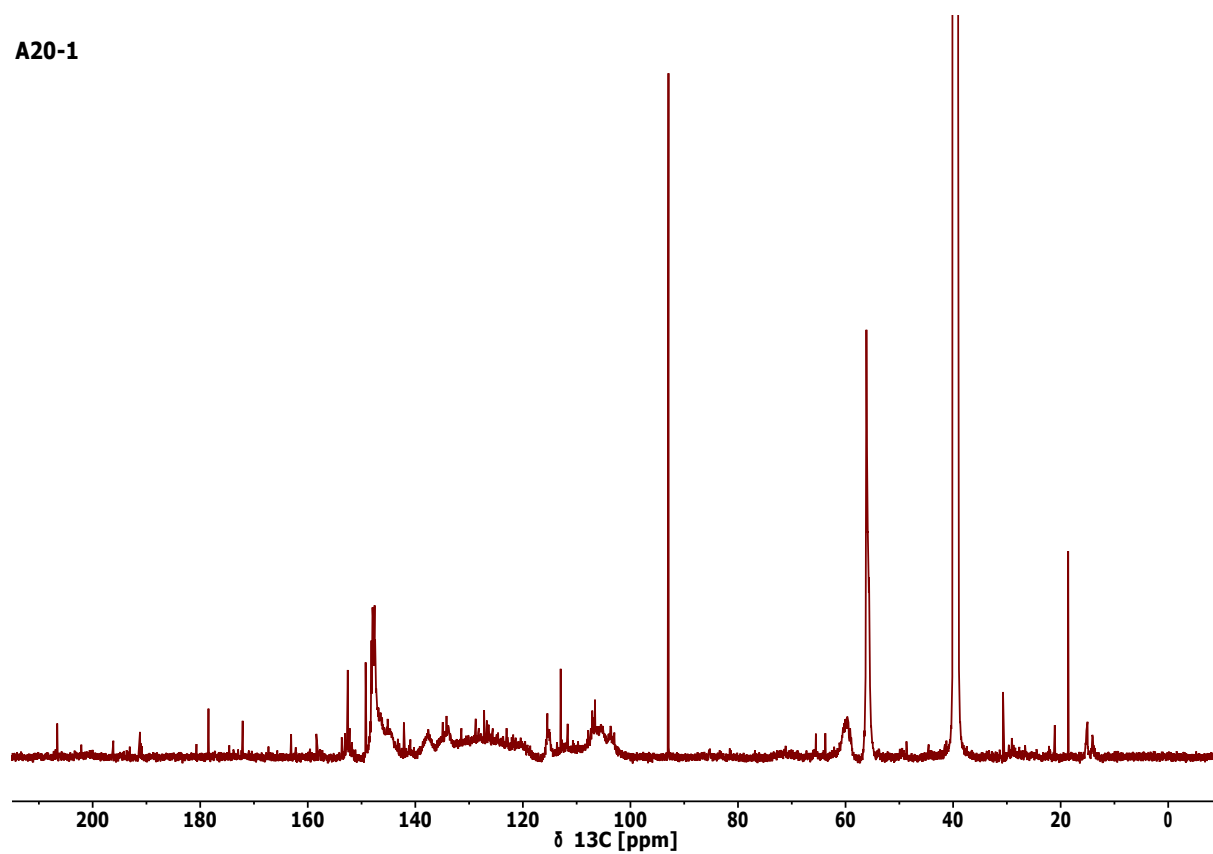

A20-1

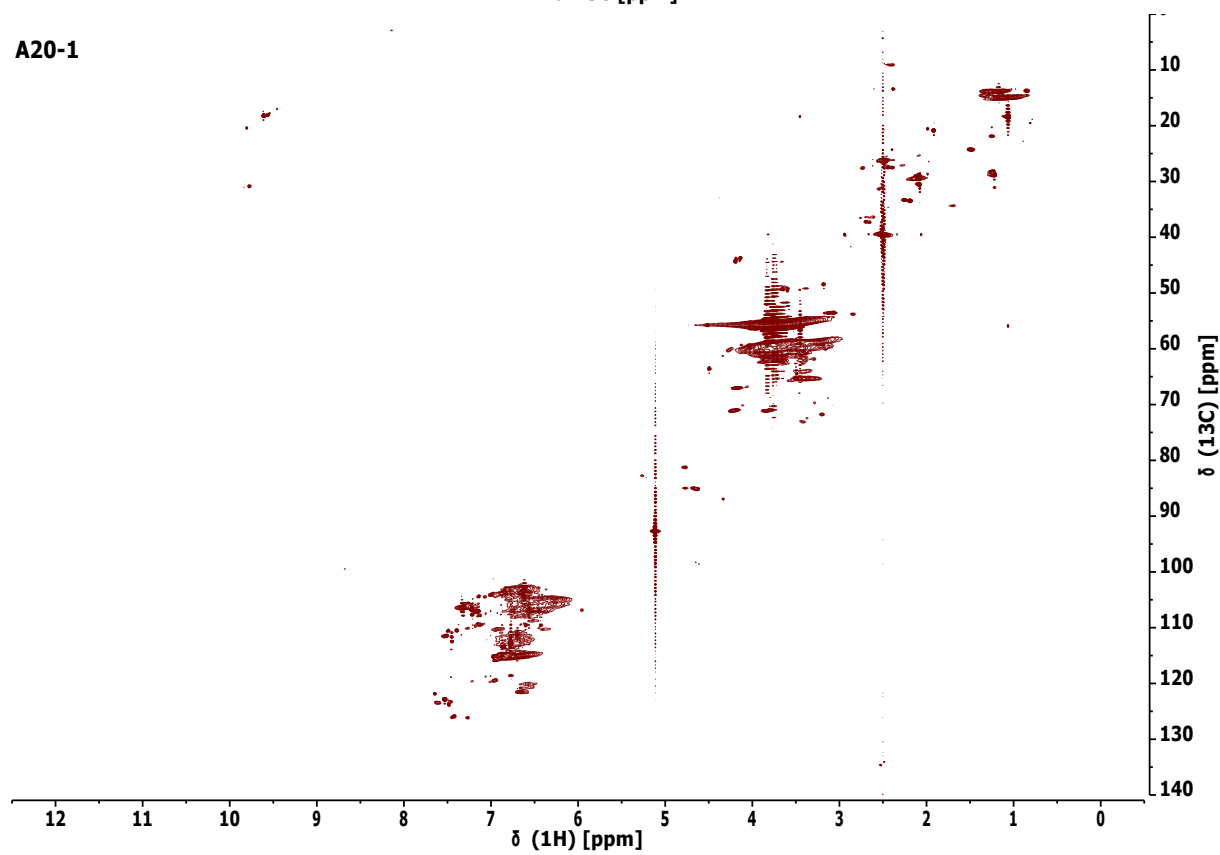

**Figure S11.** The  $^{13}\text{C}$  (top) and HSQC (bottom) spectra for lignin sample A20-1.

AS0-3

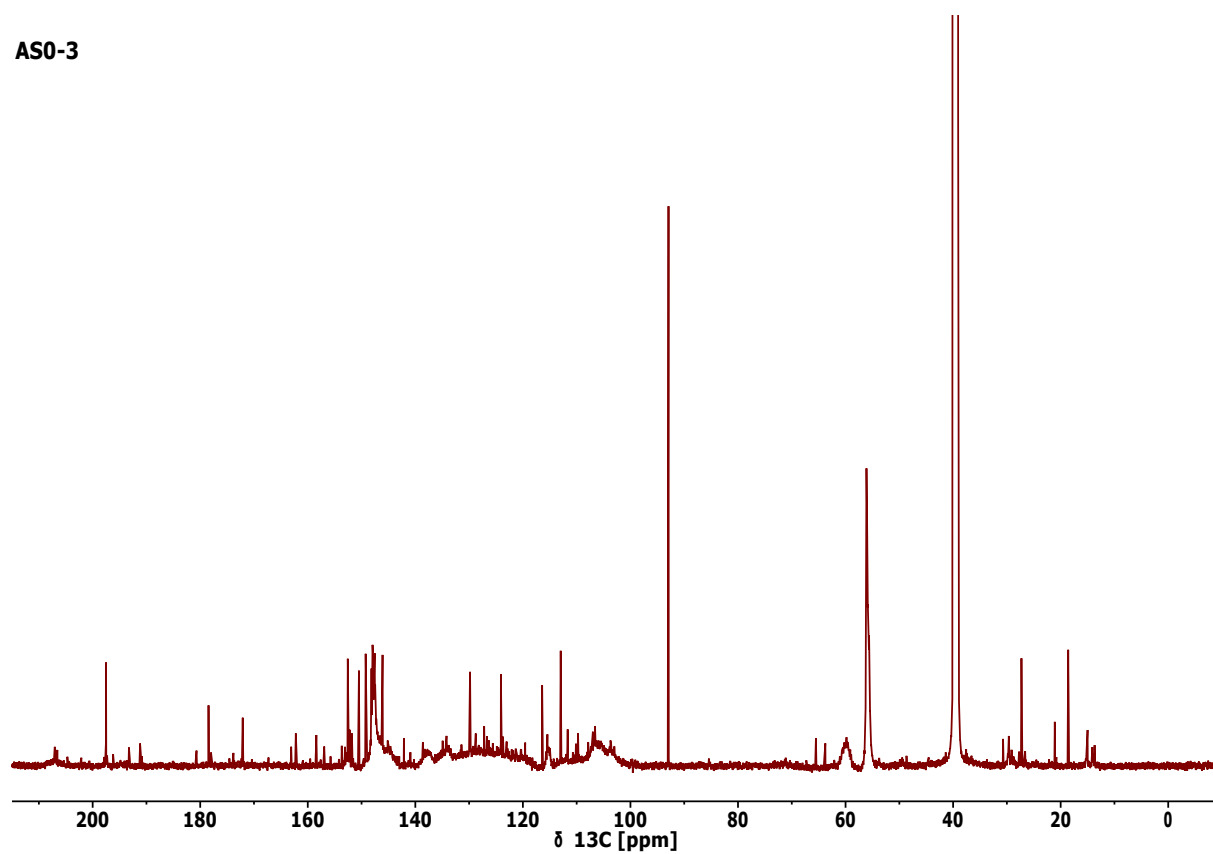

A20-3

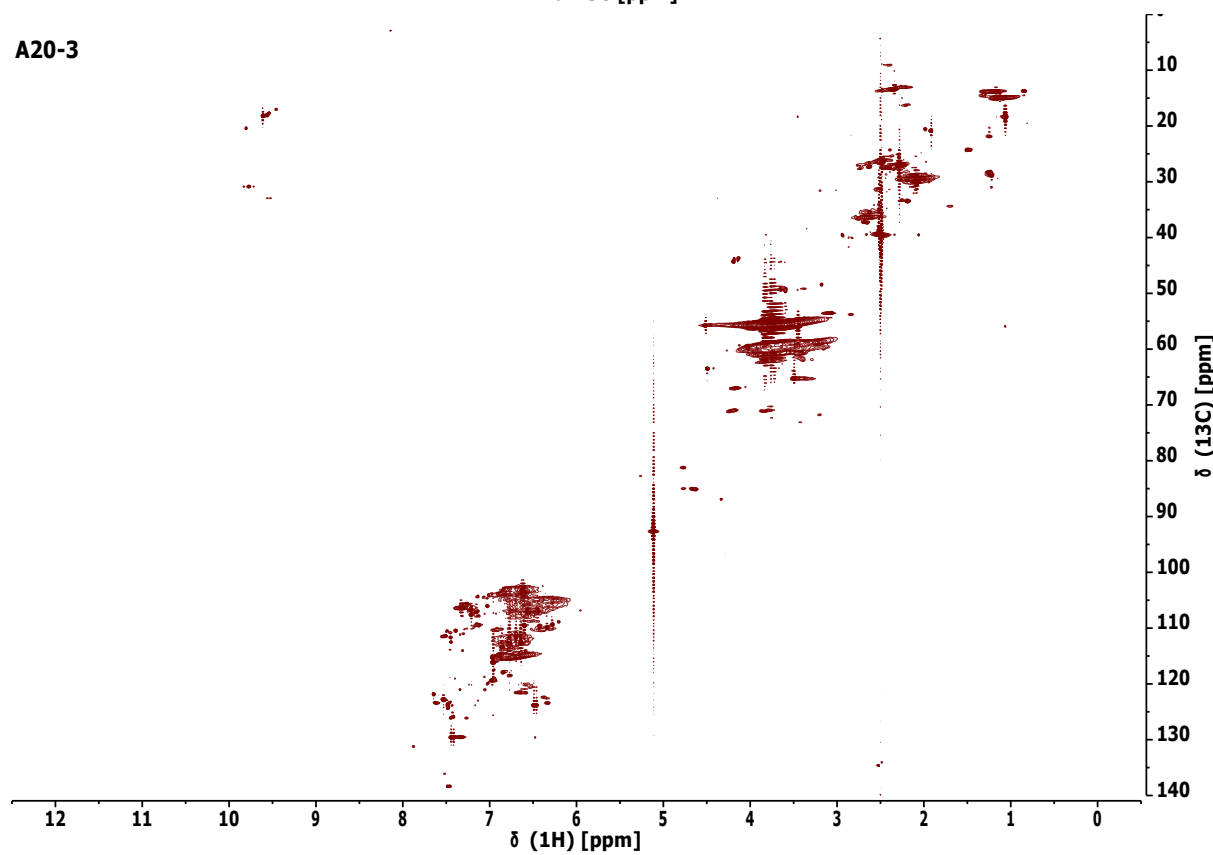

**Figure S12.** The  $^{13}\text{C}$  (top) and HSQC (bottom) spectra for lignin sample A20-3.

A20-4

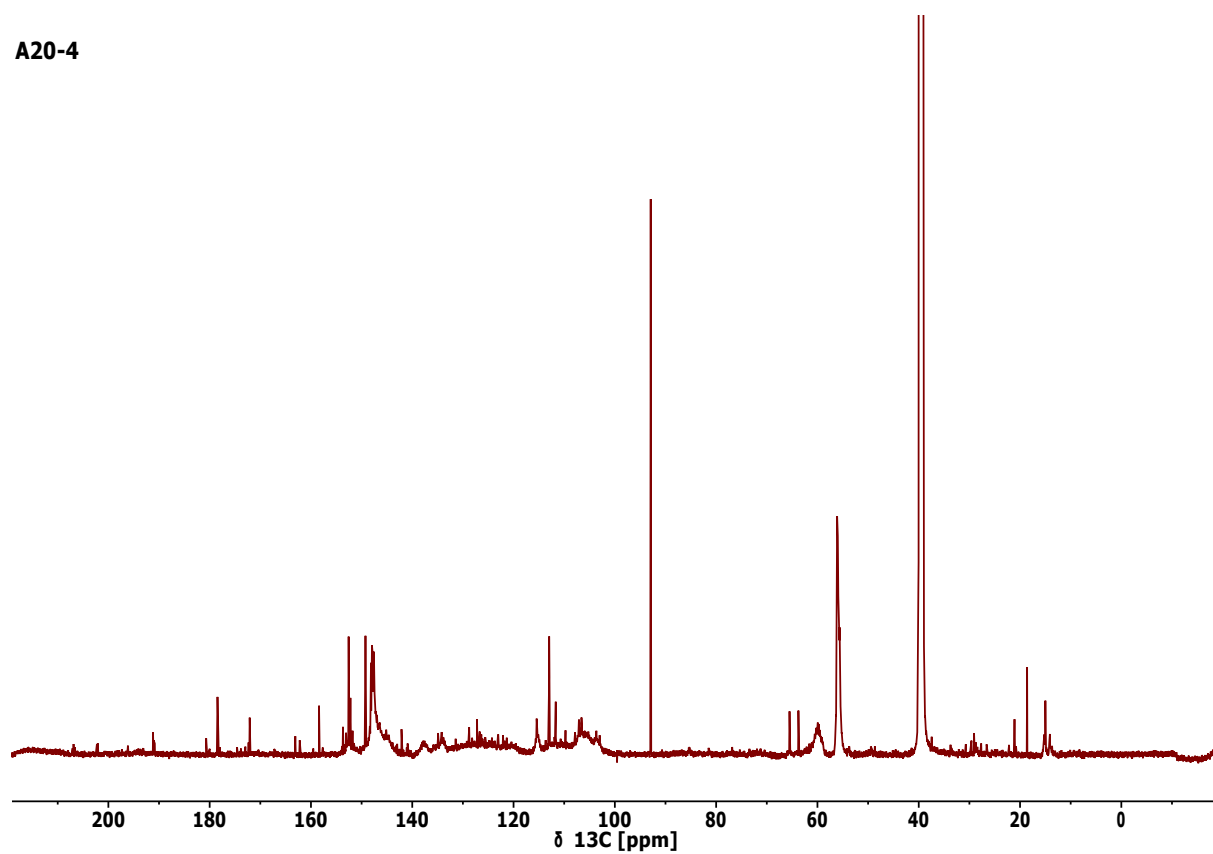

A20-4

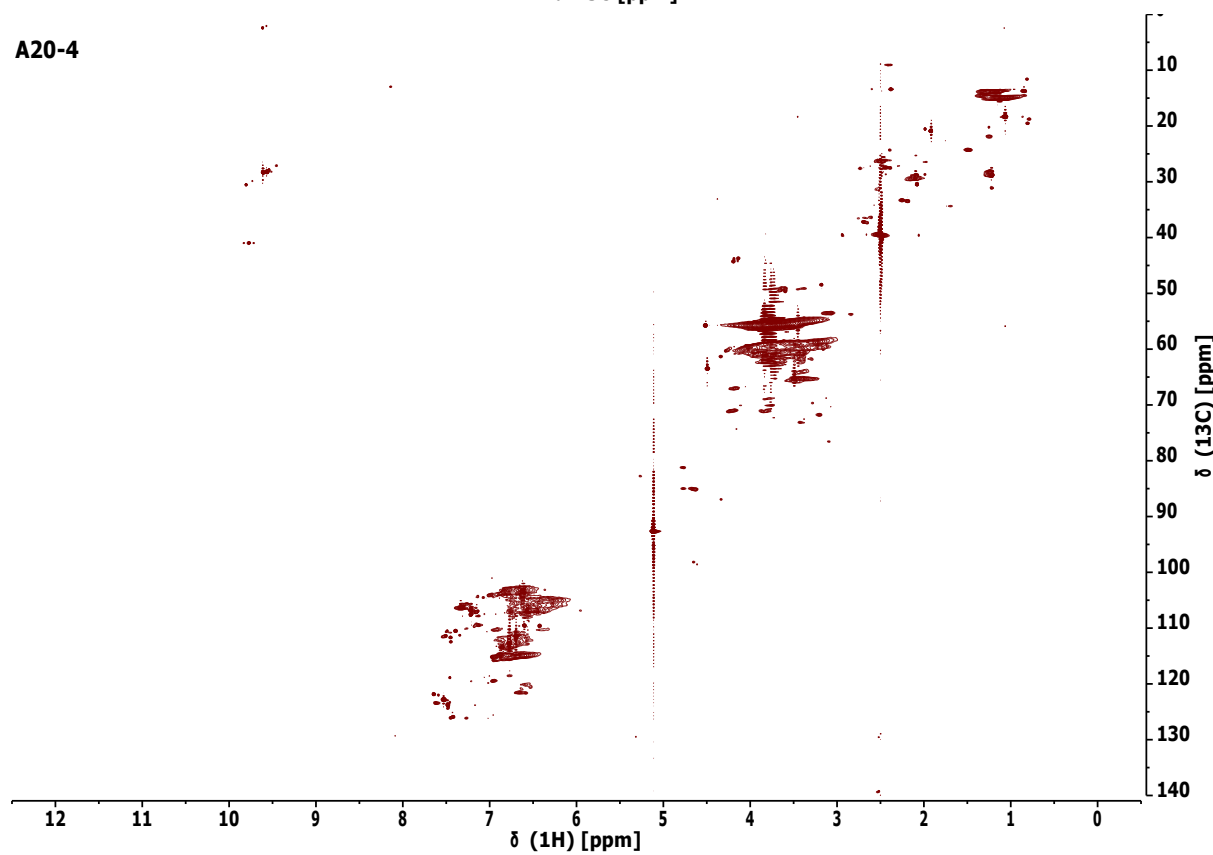

**Figure S13.** The  $^{13}\text{C}$  (top) and HSQC (bottom) spectra for lignin sample A20-4.

A20-6

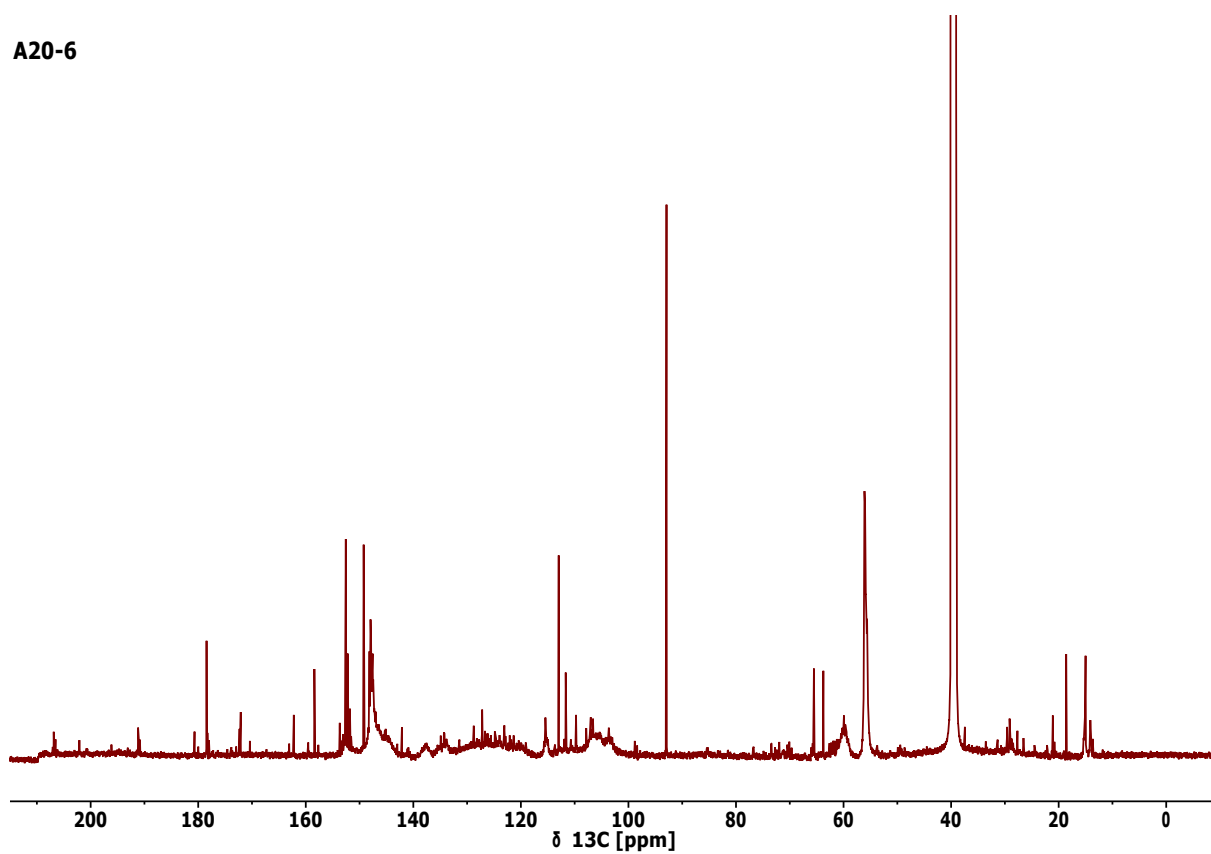

A20-6

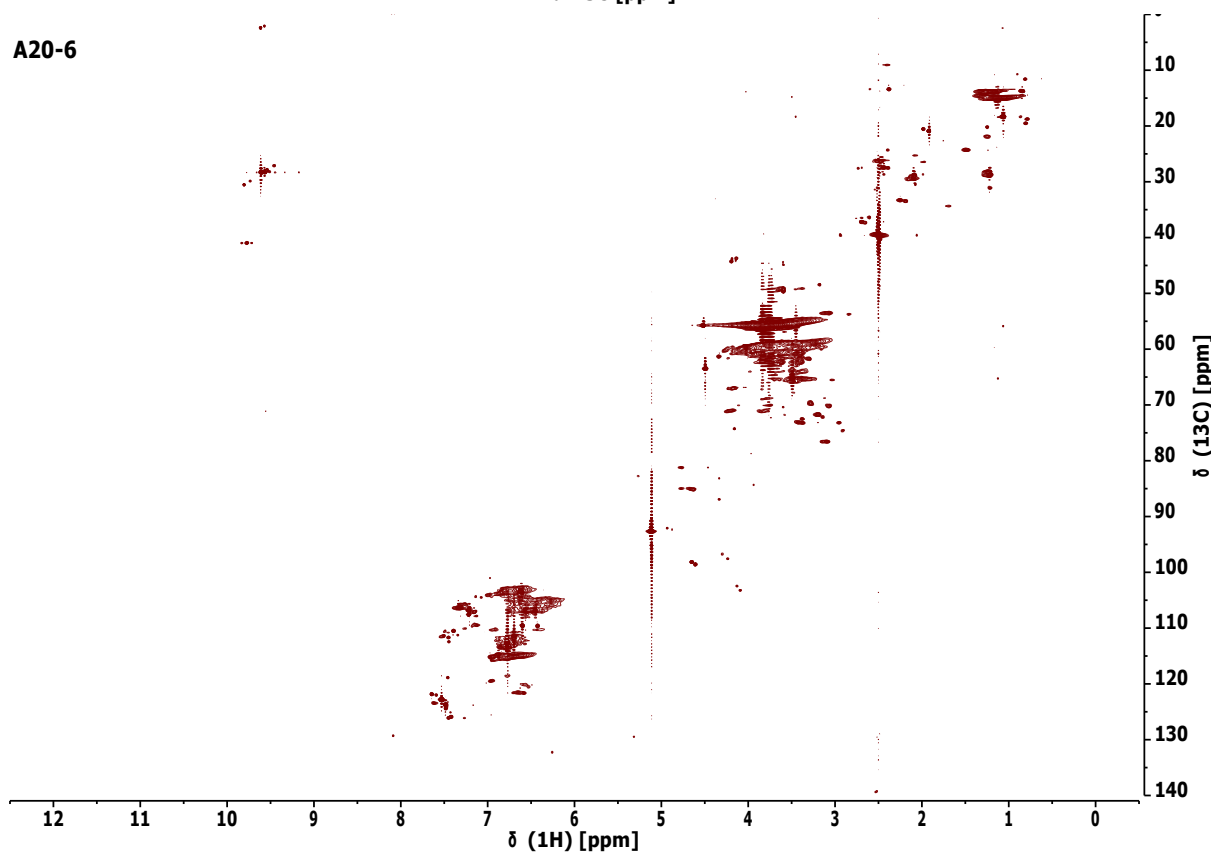

**Figure S14.** The  $^{13}\text{C}$  (top) and HSQC (bottom) spectra for lignin sample A20-6.



A20-7

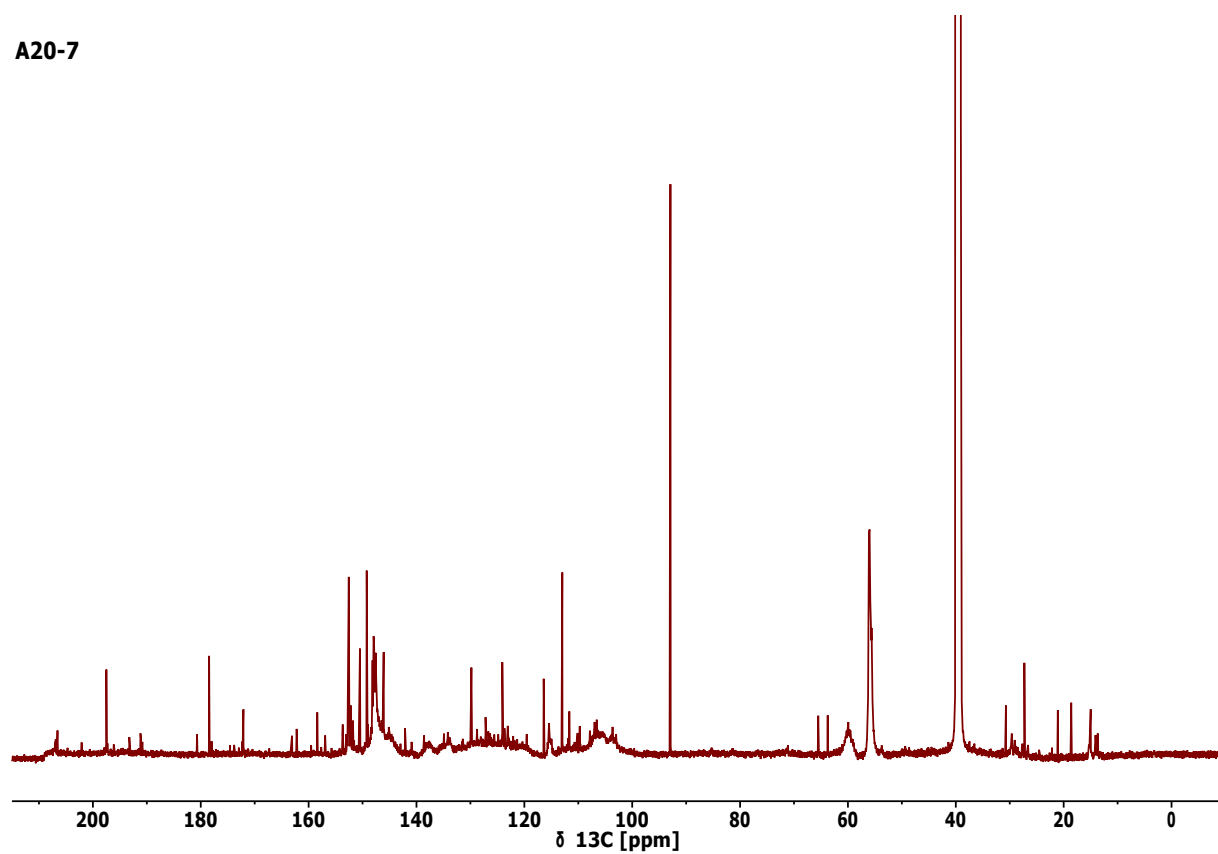

A20-7

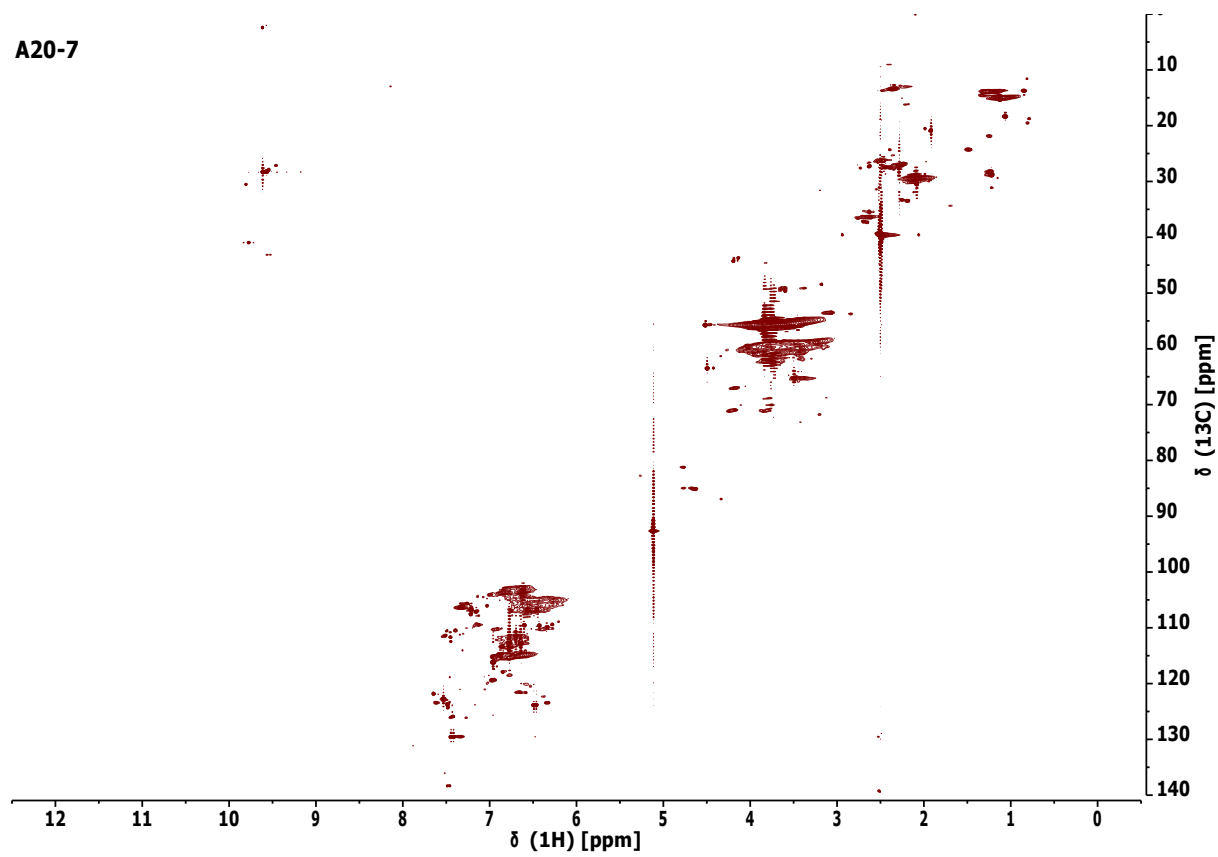

Figure S15. The  $^{13}\text{C}$  (top) and HSQC (bottom) spectra for lignin sample A20-7.

A20-9

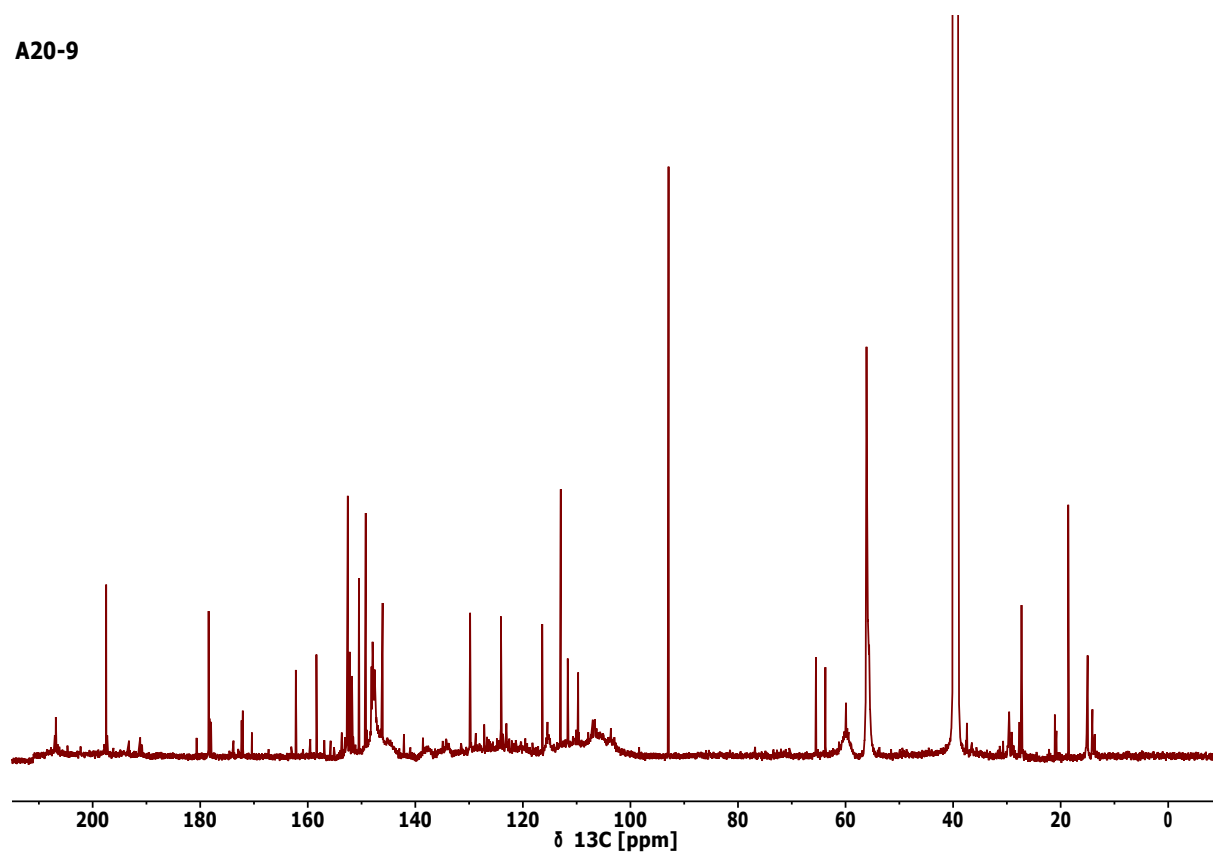

A20-9

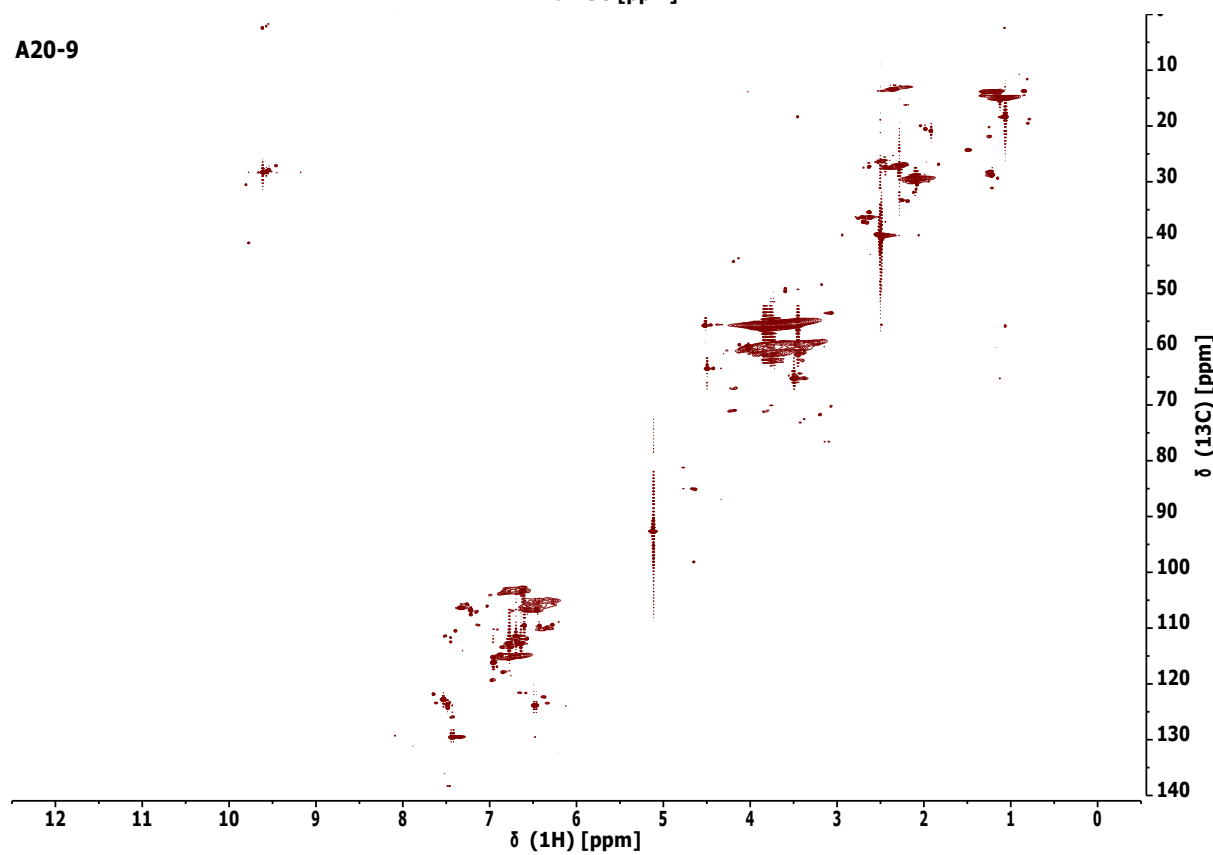

**Figure S16.** The  $^{13}\text{C}$  (top) and HSQC (bottom) spectra for lignin sample A20-9.

A20-10

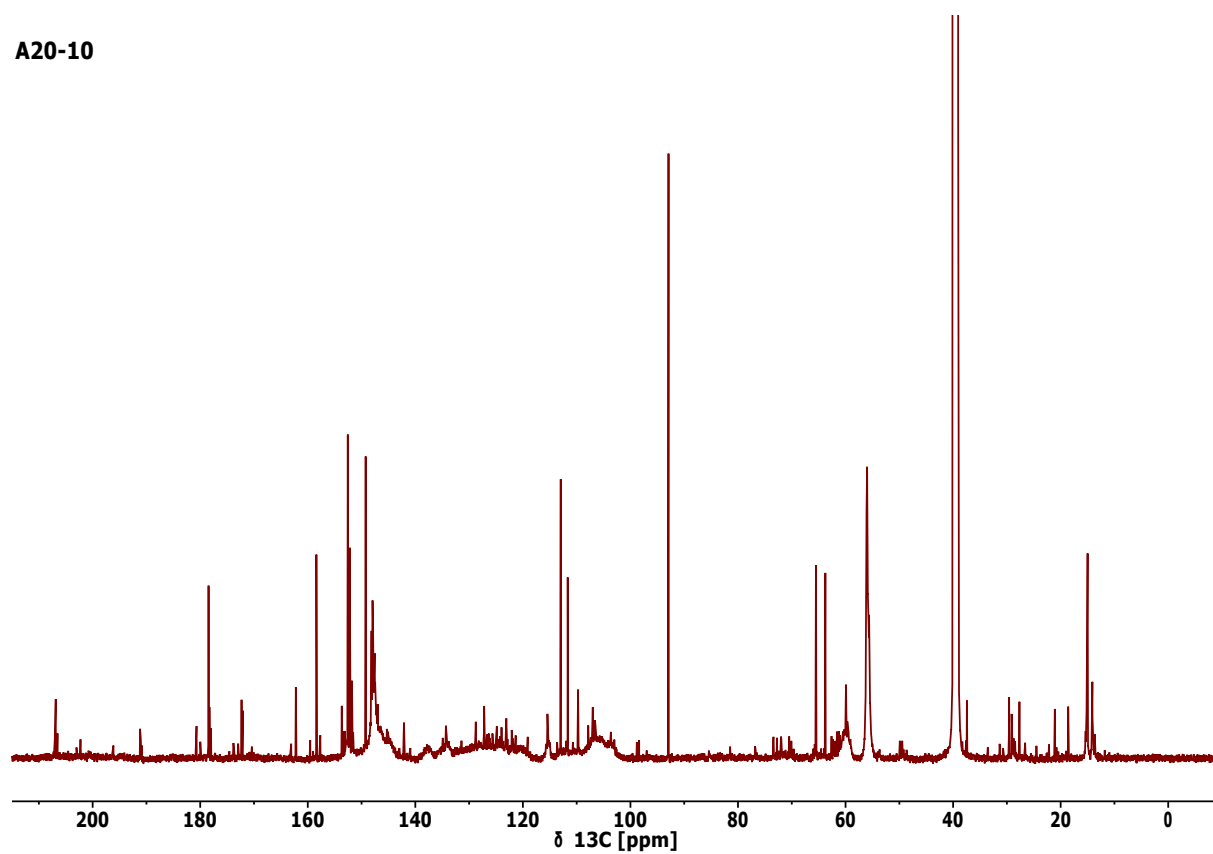

A20-10

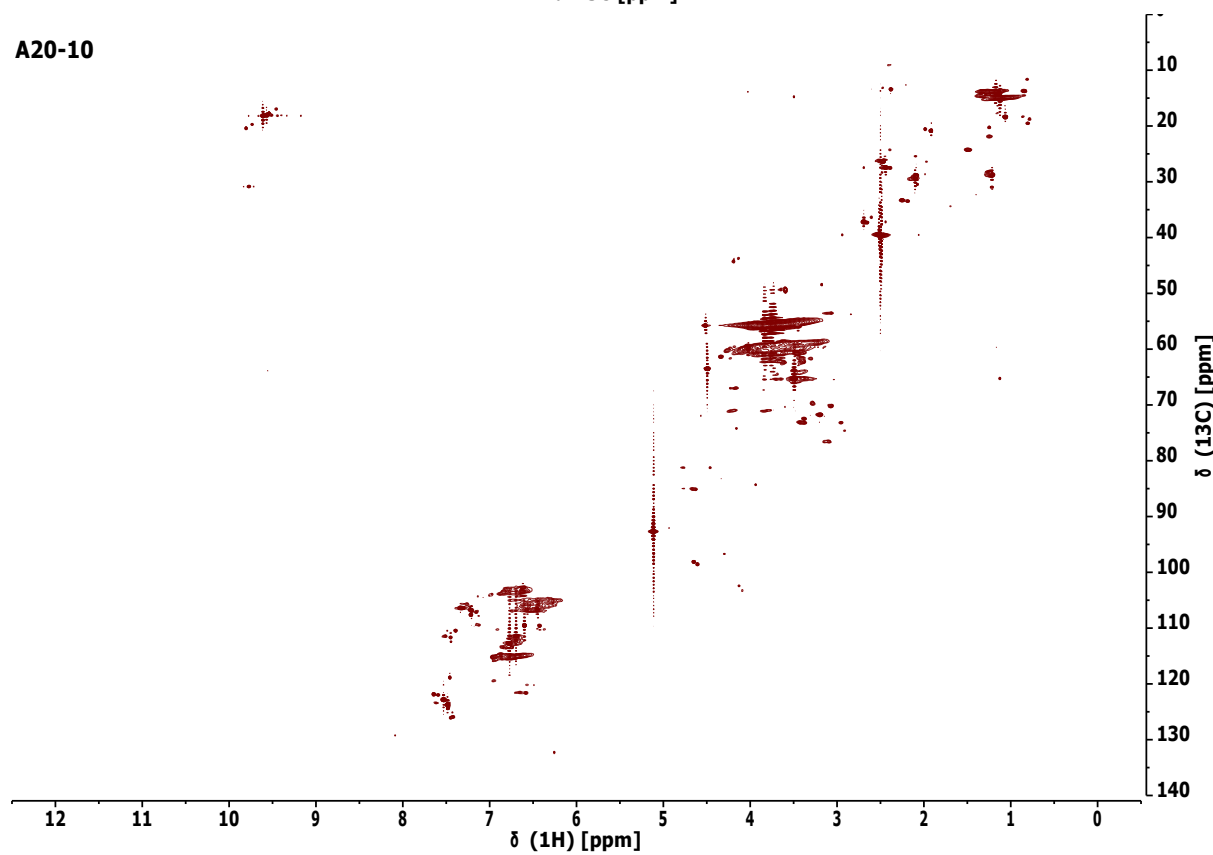

Figure S17. The  $^{13}\text{C}$  (top) and HSQC (bottom) spectra for lignin sample A20-10.

A20-12

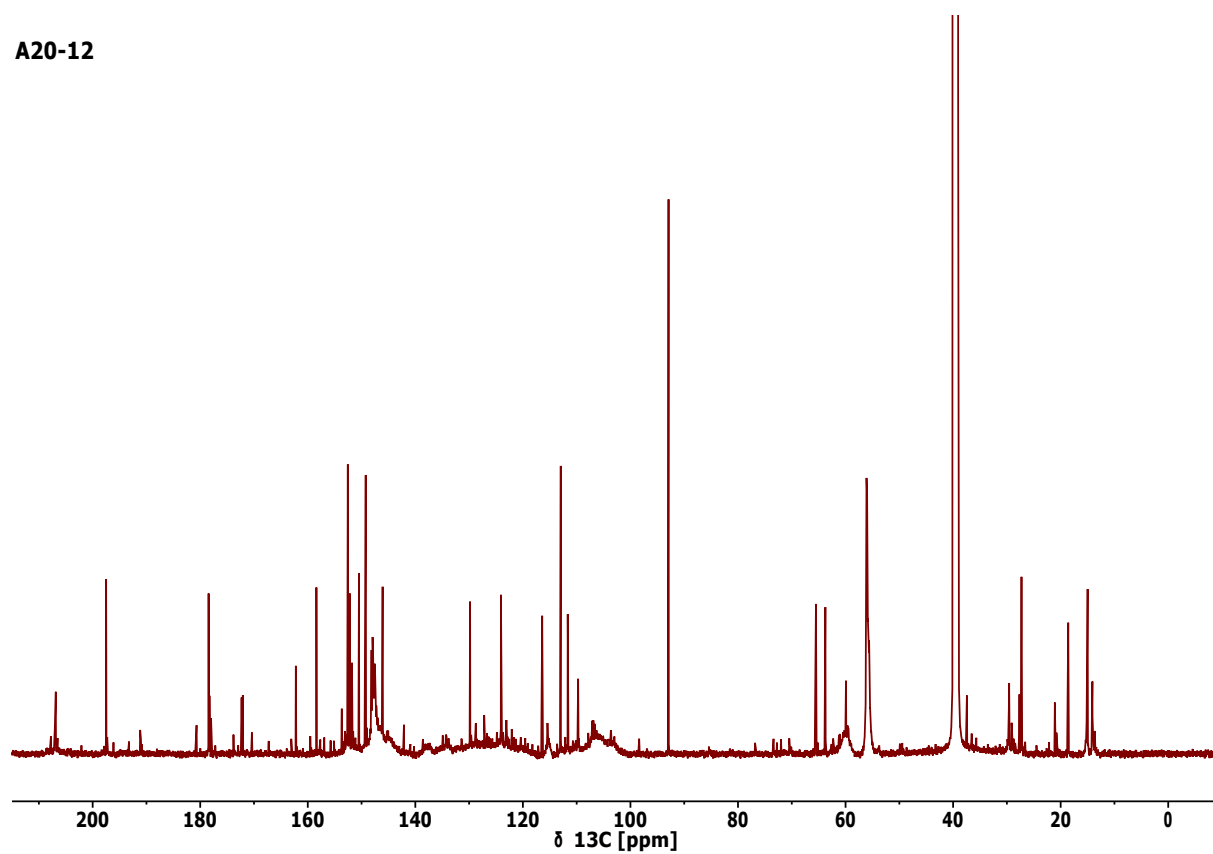

A20-12

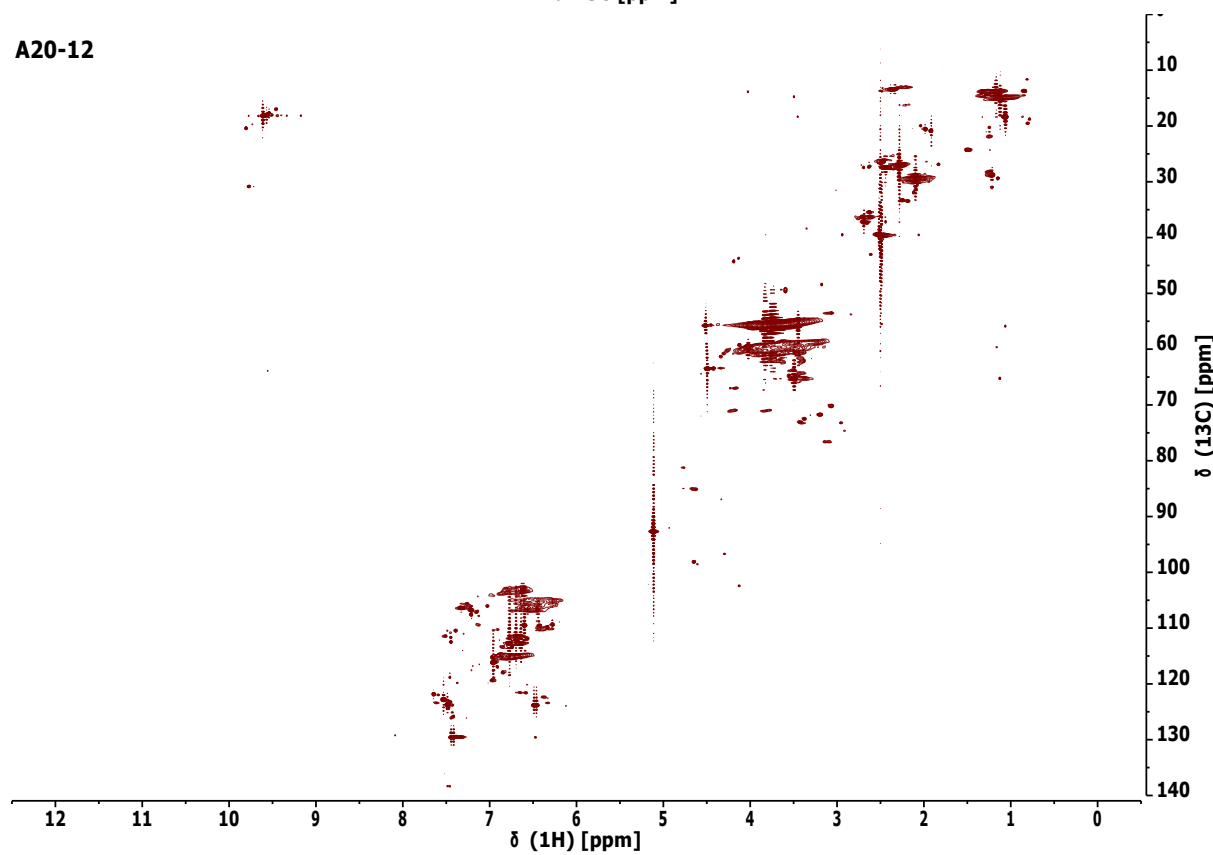

**Figure S18.** The  $^{13}\text{C}$  (top) and HSQC (bottom) spectra for lignin sample A20-12.
